# Supplementary material for: What are effective approaches to increasing rates of organ donor registration among ethnic minority populations: a systematic review
Source: PubMed Central journal article supplement — BMJ Open. 2013 Dec 19;3(12):e003453. doi: 10.1136/bmjopen-2013-003453 (PMC3884619; doi:10.1136/bmjopen-2013-003453), 2013-12-19
Supplement: bmjopen-2013-003453.draft_revisions.pdf [file bmjopen-2013-003453.draft_revisions.pdf]

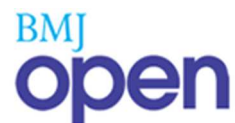

**What are effective approaches to increasing rates of organ donor registration among ethnic minority populations; a systematic review.**

|                                 |                                                                                                                                                                                                                                                 |
|---------------------------------|-------------------------------------------------------------------------------------------------------------------------------------------------------------------------------------------------------------------------------------------------|
| Journal:                        | <i>BMJ Open</i>                                                                                                                                                                                                                                 |
| Manuscript ID:                  | bmjopen-2013-003453                                                                                                                                                                                                                             |
| Article Type:                   | Research                                                                                                                                                                                                                                        |
| Date Submitted by the Author:   | 20-Jun-2013                                                                                                                                                                                                                                     |
| Complete List of Authors:       | Deedat, Sarah; King's College London, Primary Care & Public Health Sciences<br>Kenten, Charlotte; King's College London, Primary Care & Public Health Sciences<br>Morgan, Myfanwy; King's College London, Primary Care & Public Health Sciences |
| <b>Primary Subject Heading</b>: | Public health                                                                                                                                                                                                                                   |
| Secondary Subject Heading:      | Health policy, Health services research, Public health                                                                                                                                                                                          |
| Keywords:                       | Organisation of health services < HEALTH SERVICES ADMINISTRATION & MANAGEMENT, Transplant medicine < INTERNAL MEDICINE, End stage renal failure < NEPHROLOGY                                                                                    |
|                                 |                                                                                                                                                                                                                                                 |

SCHOLARONE™  
Manuscripts

Only

1  
2  
3  
4  
5 **What are effective approaches to increasing rates of organ donor registration among ethnic**  
6 **minority populations: a systematic review.**  
7  
8  
9

10  
11 **Abstract**  
12

13  
14 **Objectives:** To identify effective interventions to increase organ donor registration and improve  
15 knowledge about organ donation among ethnic minorities in North America and the UK.  
16

17 **Design:** Systematic Review

18 **Data Sources:** Medline, Embase, Psychinfo, Cinahl and Cochrane Central searched to November  
19 2012 together with four trials databases.  
20

21 **Review methods:** An interpretive and thematic approach to synthesis was undertaken which  
22 examined the nature and delivery of interventions in relation to a range of outcomes (verified  
23 registration, changing knowledge and measured shift towards greater readiness). The authors'  
24 independently assessed the eligibility of the identified studies and undertook a quality assessment.  
25

26 **Results:** 18 studies were included in the review, of which all but one were conducted in North  
27 America, and comprised both educational and mass media interventions. Mass media interventions  
28 alone reported no significant change in intention or willingness to register. Educational or combined  
29 approaches with a strong interpersonal component were most likely to be effective in increasing  
30 registration rates, particularly if delivered in a familiar environment by trained lay individuals and  
31 with an immediate opportunity to register.  
32

33 **Conclusion:** There is a need to develop robust intervention studies that match the populations' stage  
34 of readiness to register. Measured outcomes should include both registration and shifts along the  
35 pathway towards this behavioural outcome.  
36  
37

38 **Key Words:** ethnicity, organ donor registration, organ donation, systematic review, intervention  
39 studies, UK, North America  
40  
41  
42  
43

44  
45  
46  
47  
48  
49  
50  
51  
52  
53 Abstract: 208  
54  
55  
56  
57  
58  
59  
60

## Article Summary

### 'Article focus'

What interventions have been effective in improving knowledge about donation and rates of registration among minority ethnic groups?

How, where and under what conditions can a particular approach best be implemented?

### 'Key messages'

- Community based education campaigns are more effective than media campaigns alone in increasing organ donor registration.
- Interventions need to be targeted to the population's stage of readiness to register as a donor.
- The outcome of registering as a donor should be complemented by assessment of shifts along the pathway towards achieving this goal, with increased knowledge and attitudinal changes forming necessary stages towards registration.

### 'Strengths and limitations of this study'.

Limitations of the review are the heterogeneity of study populations, measures and outcome variables and the need to extrapolate from largely North American studies. It is also notable that few studies explicitly mentioned an attempt to connect with the target population during the developmental phase and access acceptability, while reporting of important contextual information relating to the interventions was sparse.

Strengths are the systematic search covering and the detailed analysis of both process and outcomes that identified messages for increasing the acceptability and effectiveness of interventions.

**Funding and disclaimer**

This paper presents independent research funded by the National Institute for Health Research (NIHR) under its Programme Grants for Applied Research Programme (Grant Reference Number RP-PG-0707-10123). The views expressed in this paper are those of the authors and not necessarily those of the NHS, the NIHR or the Department of Health.

**Competing Interests:**

None of the authors have any competing interests. No support from any organisation for the submitted work; no financial relationships with any organisations that might have an interest in the submitted work in the previous three years [or describe if any], no other relationships or activities that could appear to have influenced the submitted work

## Background

There is a continuing debate in the UK regarding the merits of a shift towards a system of presumed consent for deceased organ donation to close the gap between the supply of organs for transplant and the numbers required to meet needs [1]. This gap is particularly significant for members of ethnic minority populations, with Black and South Asian people comprising 8.4% of the UK population, [2] and 20% of the active kidney transplant waiting list but only about 3% of deceased donors [3]. This is particular significance given the greater prevalence among ethnic minorities of blood groups and human leukocyte antigen (HLA) types that are less common in the general population. This shortage of well matched organs results in Black and South Asian minority groups in the UK having a median waiting time for kidney transplantation that is about twice that of the general population [3]. Similarly African Americans account for 13% of the population but constitute 34% of those waiting for a kidney in the USA, [4] reflecting both the availability of suitable organs and inequalities in access to transplantation.

Many of the barriers to donation among ethnic minorities have been identified as potentially modifiable, including lack of knowledge of the need for donors and how to donate, a lack of trust in health professionals and the fairness of the organ allocation system, together with uncertainties regarding their faith's beliefs about the acceptability of organ donation[5,6]. The UK's Organ Donation Taskforce therefore identified a particular need to identify and implement the most effective methods to promote organ donation and registration among ethnic minority populations [7].

This review systematically assesses the best available evidence to determine the effectiveness of interventions designed to improve rates of registration and address poor knowledge to donation among ethnic minority populations. It also examines issues of implementation and seeks to identify how, where and under what conditions a particular approach can be implemented to maximum effect.

## Methods

**Data sources & searches:** The following databases were searched in December 2009 and refreshed in November 2012: Medline, Embase, Psycinfo, Cinahl and Cochrane Central. Trials databases were searched for relevant studies: UKCRN, ClincialTrials.gov, WHO international Clinical Trials Registry Platform and Health Service Research Projects in Progress.

A scoping search was initially run in Medline and then revised and re-run and subsequently adapted for alternative databases. Ethnicity was defined as a visible [non-white] ethnic minority, with specific

1  
2  
3 ethnic categories being those attributed, with a range of terms required to identify the appropriate  
4 ethnic minority populations (Fig 1 here). Further searches for academic and grey literature were  
5 made using search engines and by hand checking relevant publications and direct contact with  
6 experts in the field.  
7  
8

9  
10 **Relevance and Quality Assessment:** Studies were included if they reported interventions designed  
11 to change rates of registration, intention/willingness to become a donor or to change knowledge  
12 about organ donation among ethnic minorities. Where interventions were not targeted specifically  
13 at ethnic minorities, studies were included if sub group analysis by ethnicity was conducted. Studies  
14 were excluded if they did not include original data, or reported a meeting abstract only but inclusion  
15 was not restricted by study design (see Fig 2).  
16  
17  
18  
19

20  
21 Following initial de-duplication, 557 papers remained (see figure 1). Two authors (SD & CK)  
22 independently reviewed the title and abstract of all citations identified and applied the exclusion  
23 criteria. Where information was not sufficient the full article was retrieved for review. Papers  
24 rejected at this stage were mainly cross sectional studies that did not report an intervention to  
25 either increase registration or address knowledge gaps about organ donation in ethnic minority  
26 populations.  
27  
28  
29

30  
31 < Fig 2 here >  
32

33  
34 Quality assessment drew on categories of the “Assessment Tool for Quantitative Studies” [8] that  
35 were applicable across studies and included criteria developed by the Medical Research Council for  
36 the development and evaluation of complex interventions [9] (see Box 1 and Table 2).  
37  
38

39  
40 <Box 1 and table 2 here >  
41

42 **Data synthesis:** Wide variations in outcomes, populations and study design of included studies  
43 precluded meta-analysis. An interpretive and thematic approach to synthesis was therefore  
44 undertaken and examined both the nature and delivery of interventions and the outcomes achieved.  
45  
46

## 47 Results

### 48 Study Characteristics

49  
50 The 18 included studies were conducted between 1993 and 2012. These either evaluated the effects  
51 of an ethnically targeted mass media campaign or community based education. With the exception  
52 of one UK study, all were undertaken with ethnic minority populations in the USA, mainly African  
53 Americans or Hispanics [10-14]. Whereas most interventions adopted a pre and post evaluation  
54  
55  
56  
57  
58  
59  
60

1  
2  
3 design (Table 1), studies published since 2009 mainly employed a cluster randomised design [11-12,  
4 14 15]. Outcomes assessed were verified registration, self reported registration status or knowledge  
5 about organ donation (see table 1).  
6  
7  
8  
9

### 10 ***Educational Interventions***

11  
12  
13 Eleven papers reported educational interventions. Recruitment occurred through places of worship  
14 and/or educational establishments, and delivered by a range of individuals including recipient  
15 families, trained lay individuals, or organ transplant and procurement staff. Six studies were  
16 designed for a specific ethnic group, with the remainder aimed at a multi-ethnic audience (see  
17 table1)  
18  
19  
20  
21

22 **Verified registration:** Three cluster randomised trials reported an outcome of verified enrolment on  
23 a donor register [10-11 15]. Two of these studies trained individuals embedded within community  
24 settings to deliver the intervention [10 11], with both these interventions having a strong  
25 interpersonal element and were delivered in familiar settings of a local church or hairdresser. Peer  
26 educators in Andrews' study [11] mostly had a medical background and were involved in a Church  
27 Health Committee. They undertook a four-hour training package that comprised general information  
28 about organ donation and tips on integrating the topic into church discussions. In Resnicow's study  
29 [10] hair stylists were trained over two days with this including practical techniques to facilitate  
30 communication (motivational interviewing) and general organ donation information.  
31  
32  
33  
34  
35  
36  
37

38 There were wide variations in the duration of these study interventions: participants in the Church  
39 study were exposed over a period of 12 months, while interventions with a hair stylist ran for 1  
40 session per month for four months. In contrast the third intervention in this category did not have a  
41 strong interpersonal element, and trialled the use of a 5 minute educational film to address common  
42 barriers to organ donation that was targeted at those attending the state vehicle licensing office[15].  
43 Across all three interventions the exposed group were significantly more likely to register than the  
44 controls, although the effects of the video intervention among vehicle licensing office attendees  
45 were significant for White and African Americans but not Hispanic participants [15], possibly  
46 reflecting their small number (n=-28).  
47  
48  
49  
50  
51  
52

53 Three further community educational studies with a follow-up or cross sectional design reported  
54 strategies to increase organ donor registration. Feely et al[17] reported a 1.6% increase in new organ  
55 donor registrations following campus led peer education among students from six university  
56 campuses in the US that were selected as having a high percentage of minority student enrolment.  
57  
58  
59  
60

1  
2  
3 Similarly, a study in Arizona focused on Hispanics attending a large community event found that  
4 advertising and offering an immediate opportunity to register produced significantly greater  
5 registration rates compared with the use of a generic slogan and offering general information about  
6 organ donation (86% vs. 54%) [18]. A further UK community-based educational intervention study  
7 focussed on attendees at a range of venues and community events selected to maximise  
8 engagement with BME communities (A Warrens, personal communication, 2013). The authors  
9 report that following discussion with a trained BME Peer Educator and the availability of facilities for  
10 registering, 9% of those not already on the Organ Donor Register joined on the day. The intervention  
11 was also shown to be most effective among those who had previously considered signing up but  
12 who did not know how to go about it. These community educational studies thus identify important  
13 influences on registration as both the individual's prior readiness and access to registration.  
14  
15  
16  
17  
18  
19  
20

21 <TABLE 3>  
22

23  
24 **Changing Knowledge:** This formed the outcome for three educational interventions [16 19 20] and  
25 was assessed by asking participants to indicate whether a range of statements regarding organ  
26 donation were true or false. These studies conceived knowledge as comprised of five facets; 1)  
27 *general knowledge about donation*; 2) *knowledge of the relevance of donation to ethnic minority*  
28 *population*; 3) *knowledge about the procurement and allocation of organs*; 4) *religious and cultural*  
29 *knowledge about organ donation*; and 5) *knowledge about the financial costs of organ donation*.  
30 Presentations to participants were delivered by ethnic minority transplant surgeons and  
31 donor/recipient families. Interventions tended to be one-off and commonly lasted one hour, with  
32 immediate follow-up questionnaires administered to participants. Two studies focused on improving  
33 knowledge solely within the lay population, whereas one study in Alaska delivered training to both  
34 lay and professional groups [20] and found significant increases in knowledge among both students  
35 from 58% to 95% correct ( $p<.0001$ ) and community health practitioners ( $p<.0001$ ).  
36  
37  
38  
39  
40  
41  
42  
43

44 Table 4 shows the number of items where a significant increase in knowledge was observed post  
45 test. However, there was no assessment of the extent to which the gains in knowledge were  
46 maintained or the effects on willingness to become an organ donor or to discuss donation intent.  
47  
48  
49

50 <TABLE 4>  
51

52 **Measured shift towards greater readiness:** Two educational interventions were informed by the  
53 Trans Theoretical Model of Behaviour Change (TTM) to measure change in individual's 'readiness to  
54 become an organ donor' [11 21]. Both studies aimed to measure change across the five TTM stages  
55 from pre-contemplation to maintenance (box 2). In Fahrenwald's study 56.9% of participants  
56  
57  
58  
59  
60



1  
2  
3 progressed to a more advanced stage at post test and none regressed, while Arriola reported that  
4 intervention participants were 1.53 times more likely to be in a later stage of readiness than control  
5 participants.  
6  
7

8  
9 Collaboration with members of the targeted ethnic population was undertaken to ensure the  
10 relevance and acceptability of the intervention. For Arriola et al[12] this involved a specific focus on  
11 religious objections to organ donation, involvement of the church pastors and the use of a well  
12 known gospel choir to present the intervention video, whereas Fahrenwald et al [22] included  
13 respected members of Native American tribes and their storytelling traditions to convey donation  
14 messages. There were significant differences in participant exposure; participants in Arriola's study  
15 were exposed to intervention materials in the home at several time points over a year (e.g. through  
16 video, pamphlets and greetings cards), whereas Fahrenwald's participants received a short  
17 intervention lasting between 30 and 60 minutes that involved watching a video about organ  
18 donation followed by a group discussion. These studies provide evidence of positive movement  
19 towards readiness to become an organ donor, sign a donor card or talk to family members about  
20 their preferences, although whether those at a later stage of readiness actually signed a donor card  
21 is less clear. This issue is reflected in the UK community study where only a small proportion of  
22 participants who stated an intention to register in the future had done so at follow-up (A Warrens,  
23 personal communication, 2013).  
24  
25  
26  
27  
28  
29  
30  
31  
32  
33  
34  
35

### 36 **Mass Media Interventions**

37  
38 All media interventions attempted to detect changes in willingness or intention to join a donor  
39 register or sign a donor card [14 23-26]. However interventions that solely utilised mass media  
40 reported no significant change in intention or willingness to register an organ donor, despite  
41 focusing on a single ethnic group and undertaking formative research in the target population (see  
42 table 4 below). In contrast, a high level of success was achieved by one study[13] which innovatively  
43 combined mass media techniques with interpersonal communication. This was conducted at the  
44 vehicle licensing office, a setting where individuals are able to join a state donor registry. Harrison et  
45 al set out with the clear aim of focusing on members of the population categorised as *passive*  
46 positives (i.e. those favourable to organ donation but not yet joined the register). To determine the  
47 effect of each component of the intervention on registrations, the campaign occurred in three  
48 stages each lasting 3 months. The interpersonal component of the intervention accounted for the  
49  
50  
51  
52  
53  
54  
55  
56  
57  
58  
59  
60

1  
2  
3 greatest increase in registrants from 444 in the year prior to 5588 post campaign. Overall, the  
4 combined effect of the intervention components increased donation by 700%.  
5  
6  
7  
8

## 9 10 **Conclusion**

11 This review identified 18 evaluated intervention studies focusing on ethnic minorities that were  
12 either educational in nature, delivered in community settings or disseminated through mass media.  
13 Limitations of the review include the heterogeneity of study populations, measures and outcome  
14 variables, and frequent use of unvalidated measures of knowledge. All but one study was conducted  
15 in the United States and drew attention to a neglect of formal evaluation of interventions in this area  
16 the UK despite considerable activity involving both national campaigns and local engagement.  
17  
18  
19

20 In terms of methods it is notable that few studies explicitly mentioned an attempt to connect with  
21 the target population during the developmental phase and access acceptability, while reporting of  
22 important contextual information relating to the interventions was sparse. However detailed  
23 analysis of both the process and outcomes identified messages for increasing the acceptability and  
24 effectiveness of these interventions.  
25  
26  
27  
28  
29

30 Firstly, community-based educational interventions exhibited a higher level of success in terms of  
31 verified registration than those solely reliant on mass media, with characteristics of interventions  
32 that were successful in increasing registration comprising a strong interpersonal element that  
33 focused on the particular population's concerns, delivered by members of the local community in  
34 familiar environments, in a context where individuals are required to make an immediate decision  
35 about donation. In contrast, mass media campaigns designed to promote organ donation to Hispanic  
36 and African American populations did not appear to achieve this, although there was some evidence  
37 of that media interventions successfully addressed knowledge gaps and misconceptions about organ  
38 donation [13 24 25].  
39  
40  
41  
42  
43  
44  
45

46 Secondly, there are questions of whether registration represents an appropriate outcome measure  
47 for all sections of the population, given that ethnic minorities and those from socio-economically  
48 deprived backgrounds are consistently shown to have more negative views, greater concerns and  
49 less knowledge about organ donation and transplantation than the general population [27-29].  
50 Similarly, the 2010 Eurobarometer survey revealed that 20% of people polled were unable to  
51 express an opinion as to whether they would be willing to donate their organs at death, and 37%  
52 claimed to be unwilling to donate but were unsure why [30]. Such findings indicate that immediate  
53 action, such as registering as a donor, may not be an appropriate outcome for all population groups.  
54  
55  
56  
57  
58  
59  
60

1  
2  
3 Interventions should therefore consider the intermediary steps that individuals may need to pass  
4 before the desired end-point of registration can be achieved and identify clearly at the outset the  
5 stage of readiness among the intervention participants and match interventions accordingly. Moving  
6 some sections of the population from an early stage of increased knowledge to actual registration  
7 may therefore require multiple interventions that reinforce and build upon each other over a period  
8 of time. In contrast people who are further along the pathway and have reached an action stage may  
9 only require a limited 'nudge' or 'prompt' to register as an organ donor, through interventions  
10 involving behavioural prompts, cues to action and, where possible, an immediate opportunity to  
11 register.  
12

13  
14 Thirdly, the review suggests that effective interventions for those in the pre-contemplation or  
15 contemplation phase are those undertaken in familiar community settings and delivered by  
16 appropriately trained lay individuals. Lay health promoters in this context have the benefit of an  
17 established rapport with the target population[31] and the potential for gradual delivery of  
18 information that can be reinforced over time.  
19

20  
21 Current efforts to encourage organ donor registration in the UK have largely relied on mass media  
22 campaigns with some 'community engagement', while although these have not been formally  
23 evaluated there is little evidence of significant changes in overall registration rates. However the  
24 present review suggests the campaigns may have contributed to changes in knowledge, thus  
25 producing some shift along the pathway, although having less effect on registration practices. For  
26 the future there is a need to develop robust intervention studies that take account of the  
27 population's readiness to sign the donor register, with approaches ranging from personal interaction  
28 and discussion with members of the lay community and in practice facilitating a sign up process.  
29  
30  
31  
32  
33  
34  
35  
36  
37  
38  
39  
40  
41  
42  
43  
44  
45  
46  
47  
48  
49  
50  
51  
52  
53  
54  
55  
56  
57  
58  
59  
60

**ACKNOWLEDGMENTS**

We thank Karen Welch for conducting the systematic search.

**Contributions**

MM planned and supervised the study, contributed to interpretation of data and drafting the paper. SD retrieved the selected papers, was primarily responsible for study appraisal, interpreted data and undertook an initial draft. CK contributed to study appraisal, interpreted data and critically commented on drafts. All authors approved the final version.

**Funding**

National Institute for Health Research funded a Programme Grant for Applied Research of which this review is part

**Competing Interests**

None of the authors have any competing interests. No support from any organisation for the submitted work; no financial relationships with any organisations that might have an interest in the submitted work in the previous three years [or describe if any], no other relationships or activities that could appear to have influenced the submitted work

**Data sharing**

This is a systematic review and there is therefore no additional unpublished data.

## REFERENCES

1. Hamm D, Tizzard J. Presumed consent for organ donation. *BMJ* 2008;**336**(7638):230-30
2. Office for National Statistics. Census: Ethnic group (write-in responses), local authorities in England and Wales. 2013  
[www.ons.gov.uk/.../census/...census/...england-and-wales/rft-ct0010.xls](http://www.ons.gov.uk/.../census/...census/...england-and-wales/rft-ct0010.xls) (accessed 10 May 2013)
3. NHS Blood & Transplant. Organ Donation and Transplantation Activity Report 2011-2012. 2012  
[http://www.organdonation.nhs.uk/statistics/transplant\\_activity\\_report/current\\_activity\\_reports/ukt/activity\\_report\\_2011\\_12.pdf](http://www.organdonation.nhs.uk/statistics/transplant_activity_report/current_activity_reports/ukt/activity_report_2011_12.pdf) (accessed 10 May 2013)
4. US Department for Health & Human Services 2011  
<http://www.organdonor.gov/whydonate/minorities.html> (accessed 10 May 2013)
5. Morgan M, Kenten C, Deedat S. Attitudes to deceased organ donation and registration as a donor among minority ethnic groups in North America and the UK: a synthesis of quantitative and qualitative research. *Ethn Health*. Published Online First: 19 Dec 2012. doi: 10.1080/13557858.2012.752073
6. Morgan S.E, Cannon T. African American's knowledge about organ donation: closing the gap with more effective persuasive messages. *J Nat Med Assoc* 2003;**95**(11):1066-71.
7. Department of Health. *Organs for transplant: A report of the Organ Donation Taskforce*. 2008  
<http://www.dh.gov.uk> (Search for: 9291).
8. Jackson N, Waters E. Criteria for the systematic review of health promotion and public health interventions. *Health Promot Int*. 2005;**20**(4):367-74
9. Craig P, Dieppe P, Macintyre S, Michie S, Nazareth I, Petticrew M. Developing and evaluating complex interventions: the new Medical Research Council guidance. *BMJ* 2008;**337**
10. Resnicow K, Andrews AM, Beach DK, et al. Randomized trial using hair stylists as lay health advisors to increase donation in African Americans. *Ethn Dis* 2010;**20**(3):276-81
11. Andrews AM, Zhang N, Magee JC, Chapman R, Langford AT, Resnicow K. Increasing donor designation through black churches: results of a randomized trial. *Prog Transplant*. 2012;**22**(2):161-7
12. Arriola K, Robinson DH, Thompson NJ, Perryman JP. Project ACTS: An Intervention to Increase Organ and Tissue Donation Intentions Among African Americans. *Health Educ Behav*. 2009;**37**(2):264-74
13. Harrison TR, Morgan SE, King AJ, Williams EA. Saving lives branch by branch: the effectiveness of driver licensing bureau campaigns to promote organ donor registry sign-ups to African Americans in Michigan. *J Health Commun*. 2011;**16**(8):805-19
14. Radosevich DM, Larson SM, Scott T, Jones C, Tendle W, Gunderson S. The Effectiveness of the Donate Life—African American Campaign in Minneapolis—St. Paul. *Understanding Organ Donation: Wiley-Blackwell*, 2010:64-82.
15. Daryl Thornton J, Alejandro-Rodriguez M, Leon JB, et al. Effect of an iPod video intervention on consent to donate organs: A randomized trial. *Ann Intern Med*. 2012;**156**(7):483-90
16. Cárdenas V, Thornton JD, Wong KA, Spigner C, Allen MD. Effects of classroom education on knowledge and attitudes regarding organ donation in ethnically diverse urban high schools. *Clin Transplant*. 2010;**24**(6):784-93
17. Feeley TH, Anker AE, Watkins B, Rivera J, Tag N, Volpe L. A peer-to-peer campaign to promote organ donation among racially diverse college students in New York city. *J Natl Med Assoc*. 2009;**101**(11):1154-62
18. Alvaro EM, Siegel JT, Jones SP. Increasing organ donor registration rates by providing an immediate and complete registration opportunity: an experimental assessment of the IIFF model. *Psychol Health Med*. 2011;**16**(6):686-94

19. Callender CO, Hall MB, Branch D. An assessment of the effectiveness of the mottep model for increasing donation rates and preventing the need for transplantation - Adult findings: Program years 1998 and 1999. *Semin Nephrol.* 2001;**21**(4):419-28
20. Salim A, Bery C, Ley EJ, et al. A focused educational program after religious services to improve organ donation in Hispanic Americans. *Clin Transplant.* 2012; **26**(6):E634-40
21. Allen MD, Stillwater B. Organ donation and transplantation: A new tradition of sharing for Alaska Natives. Siegel, Jason T [Ed]; Alvaro, Eusebio M [Ed] (2010) *Understanding organ donation: Applied behavioral science perspectives* (pp 83-97) xxii, 368 pp Wiley-Blackwell, 2010.
22. Fahrenwald NL, Belitz C, Keckler A. "tribes sharing life": An organ donation educational intervention for american indian tribal college and university students. *West J Nurs Res* 2011;**33**(7):901-15
23. Frates J, Bohrer GG, Thomas D. Promoting organ donation to Hispanics: the role of the media and medicine. *Journal of Health Communication* 2006;**11**(7):683-98
24. Salim A, Berry C, Ley EJ, Schulman D, Navarro S, Chan LS. Utilizing the media to help increase organ donation in the Hispanic American population. *Clin Transplant.* 2011;**25**(6):E622-8
25. Alvaro EM, Jones SP, Robles AS, Siegel J. Hispanic organ donation: impact of a Spanish-language organ donation campaign. *J Natl Med Assoc.* 2006;**98**(1):28-35
26. Hebert PL, Rivera J, Eng K, Lee R, Seto-Yee S. Improving Organ Donation in Chinese Communities in New York. *Understanding Organ Donation: Wiley-Blackwell, 2010:119-31.*
27. Morgan M, Hooper R, Mayblin M, Jones R. Attitudes to kidney donation and registering as a donor among ethnic groups in the UK. *J Public Health.* 2006;**28**(3):226-34
28. Morgan SE, Miller JK, Arasaratnam LA. Similarities and differences between African Americans' and European Americans' attitudes, knowledge, and willingness to communicate about organ donation. [References]. *Journal of Applied Social Psychology* 2003(4):693-715
29. Rodrigue JR, Cornell DL, Howard RJ. Relationship of exposure to organ donation information to attitudes, beliefs, and donation decisions of next of kin. *Prog Transplant.* 2009;**19**(2):173-79
30. European Commission. Eurobarometer 333a: Organ donation and transplantation, 2010. [http://ec.europa.eu/public\\_opinion/archives/ebs/ebs\\_333a\\_en.pdf](http://ec.europa.eu/public_opinion/archives/ebs/ebs_333a_en.pdf) (accessed 10 May 2013)
31. Madigan ME, Smith-Wheelock L, Krein SL. Healthy hair starts with a healthy body: hair stylists as lay health advisors to prevent chronic kidney disease. *Preventing Chronic Disease* 2007;**4**(3):A64

Table 1 – Overview of studies included in the review

| Author & Country                                                              | Demographics Sample Size (n)                             | Study Design               | Mode of delivery                                                                                                                                                                              | Results                                                                                                                                                 | Outcomes                                                                                                               | Theoretical framework                                                                          |
|-------------------------------------------------------------------------------|----------------------------------------------------------|----------------------------|-----------------------------------------------------------------------------------------------------------------------------------------------------------------------------------------------|---------------------------------------------------------------------------------------------------------------------------------------------------------|------------------------------------------------------------------------------------------------------------------------|------------------------------------------------------------------------------------------------|
| <b>EDUCATION</b>                                                              |                                                          |                            |                                                                                                                                                                                               |                                                                                                                                                         |                                                                                                                        |                                                                                                |
| Allen and Stillwater 2010, USA [20]                                           | Alaskan Native<br>N = 54 Health Staff<br>N=<200 Students | Before & After Study       | PowerPoint presentation & video focused on issues about to OD and Alaskan natives                                                                                                             | Improved knowledge and positive attitude towards donation and intention to register post test                                                           | Knowledge & Intention to register as a donor                                                                           | Not mentioned                                                                                  |
| Alvaro, Siegel et al. 2011, USA (pertains to study II reported in paper) [17] | Hispanic                                                 | Before & After Study       | On alternate weeks employees of local organ procurement organisation offered the attendees at a flea market an immediate opportunity to register or information about organ donation          | Participants offered an immediate opportunity to register rather than just information about OD were significantly more likely to register (86 vs. 54%) | Verified registration                                                                                                  | The IFF model (Immediate opportunity, information, focused engagement & favourable activation) |
| Andrews, Zhang et al. 2012, USA [10]                                          | African American<br>Intervention n=622<br>Control n=632  | Cluster Randomised         | Members of the congregation undertook discussions with lay health advisors about organ donation. DVD designed to address OD barriers for African Americans                                    | Increase in verified enrolment on donor registry in intervention group. No increase in knowledge observed                                               | Verified enrolment on donor registry                                                                                   | Not mentioned                                                                                  |
| A Warrens, personal communication, 2013 UK                                    | Multi-ethnic<br>N=806                                    | Cross Sectional Evaluation | Peer educators trained to deliver health promotion about OD                                                                                                                                   | Increase in the % of people signed up to the organ donor register                                                                                       | Registration                                                                                                           | Not mentioned                                                                                  |
| Callender, Hall et al. 2001, USA [18]                                         | Multi-Ethnic<br>N=914                                    | Before & After Study       | Presentation about organ donation delivered by transplant recipients, donors, individuals on transplant lists health care professionals that are ethnically similar to the target population. | Improvements in knowledge and attitudes towards organ donation, high reporting of willingness to discuss OD with family                                 | Willingness to donate organs for oneself and loved ones after death<br><br>No valid measures to assess attitudes to OD | Not mentioned                                                                                  |
| Daryl Thornton, Alejandro-Rodriguez et al. 2012, USA [14]                     | Multi Ethnic<br>Intervention n=443<br>Control n=509      | Cluster Randomised         | 5 minute video about OD prior to collecting drivers licence. Controls obtained licence in the usual manner.                                                                                   | Cases more likely to register as donors compared to controls. (76% vs 54%)                                                                              | Verified enrolment on donor registry                                                                                   | Not Mentioned                                                                                  |

|                                          |                                                           |                      |                                                                                                                                                                                                                      |                                                                                                                               |                                                                                                       |                                            |
|------------------------------------------|-----------------------------------------------------------|----------------------|----------------------------------------------------------------------------------------------------------------------------------------------------------------------------------------------------------------------|-------------------------------------------------------------------------------------------------------------------------------|-------------------------------------------------------------------------------------------------------|--------------------------------------------|
| Fahrenwald, Belitz et al. 2010, USA [21] | American Indians<br>N=1580                                | Before & After Study | Out-reach coordinators facilitate delivery to small groups. Who were required to read & discuss a 1 page brochure. This was followed by a 13 min video and a group discussion facilitated by the coordinator         | Significant change in Stage of Motivational Readiness to become an organ donor post intervention                              | Stage of motivational readiness to serve as an organ donor                                            | Transtheoretical model of behaviour change |
| Resnicow, Andrews et al. 2010, USA [9]   | African American<br>Intervention n=1370<br>Control n=1419 | Cluster Randomised   | Hairstylists trained as lay health advisors used motivational interviewing to discuss OD with participants                                                                                                           | Participants receiving the intervention were 4 times more likely to join the register than the controls                       | Self reported donation status<br><br>Verified enrolment on state registry                             | Not Mentioned                              |
| Salim, Bery et al. 2012, USA [19]        | Hispanic<br>N=341                                         | Before & After Study | Presentation about the need for transplant and information about donation lead by local organ procurement organisation                                                                                               | Increase in knowledge, perceptions and beliefs. No difference willingness to discuss donation with family or intent to donate | No validated measures to assess attitudes to OD                                                       | Not mentioned                              |
| Cárdenas, Thornton et al. 2010, USA [15] | Multi-Ethnic<br>Intervention n=96<br>Control n=91         | Cluster Randomised   | Transplant surgeons & young recipients gave a presentation followed by Q&A session and a video                                                                                                                       | Knowledge increase post intervention was the strongest predictor of positive change in opinion about OD                       | Knowledge, Attitudes & Awareness of OD                                                                | None mentioned                             |
| Feeley, Anker et al. 2009, USA           | Multi-ethnic                                              | Before & After Study | Peer educators delivered a range of campus based activities                                                                                                                                                          | Increased donor registration                                                                                                  | Self reported registration                                                                            | Not mentioned                              |
| Arriola, Robinson et al. 2009, USA [11]  | African American<br>Intervention n=175<br>Control n =162  | Cluster Randomised   | Video & written materials mailed to participants                                                                                                                                                                     | Greater readiness to sign a donor card, register via drivers licence or talk to family about wishes in intervention group     | None, but questions based on theoretical model                                                        | Transtheoretical model of behaviour change |
| <b>MEDIA</b>                             |                                                           |                      |                                                                                                                                                                                                                      |                                                                                                                               |                                                                                                       |                                            |
| Alvaro, Jones et al. 2006, USA [24]      | Hispanic<br>N=2401                                        | Before & After Study | 4 x 30 sec Television<br>2x 60sec radio ads. These highlighted positive impact of transplant on Hispanic individuals and demonstrated the substantial efforts medics undertake to save the life of a potential donor | Greater reporting of pro-donation beliefs, and family discussion post intervention                                            | Self reported registration status.<br><br>No validated measures of attitude and willingness to OD     | Not mentioned                              |
| Frates, Bohrer et al. 2006, USA [22]     | Hispanic<br>N=4,500                                       | Before & After Study | Prime time television & radio slots                                                                                                                                                                                  | Year on year increase in Hispanic OD consent rates (overall 10% increase).<br>Increase in knowledge/attitudes                 | Consent rates from organ procurement organisation.<br><br>No valid measures to assess attitudes to OD | Transtheoretical model                     |



|                                        |                                          |                               |                      |                                                                                                                                                                        |                                                                                                                                                               |                                                                                                                 |                           |
|----------------------------------------|------------------------------------------|-------------------------------|----------------------|------------------------------------------------------------------------------------------------------------------------------------------------------------------------|---------------------------------------------------------------------------------------------------------------------------------------------------------------|-----------------------------------------------------------------------------------------------------------------|---------------------------|
| 1<br>2<br>3<br>4<br>5<br>6<br>7        | Salim, Berry et al. 2011, USA [23]       | Hispanic<br>N = 1052          | Before & After Study | Prime time television & radio slots                                                                                                                                    | Improved knowledge post campaign when compared to baseline                                                                                                    | Awareness, perception & belief about OD                                                                         | Not mentioned             |
| 8<br>9<br>10<br>11<br>12               | Radosevich, Larson et al. 2010, USA [13] | African American<br>N=465     | Before & After Study | Media Campaign conveyed via television, radio, targeted print media. Donor families and health care professionals were interviewed on television and radio.            | Significant increase in knowledge and attitude about organ donation post campaign<br><br>No significant change in intention and willingness to become a donor | Self Reported Registration<br>Change in Knowledge attitudes and willingness to become a donor                   | Theory of Reasoned Action |
| 13<br>14                               | <b>Media &amp; Education</b>             |                               |                      |                                                                                                                                                                        |                                                                                                                                                               |                                                                                                                 |                           |
| 15<br>16<br>17<br>18<br>19             | Harrison, Morgan et al. 2011, USA [12]   | African American<br>N=626,771 | Before & After Study | Billboards in the vicinity of vehicle licensing offices, and radio adverts. Placement of donor families at vehicle licensing offices and targeted written information. | Large increase in sign up to the donor register the magnitude of the increase was greatest when 1-1 promotion was combined with other medium                  | Verified registration                                                                                           | Communication design      |
| 20<br>21<br>22<br>23<br>24<br>25<br>26 | Hebert, Rivera et al. 2010, USA [25]     | Chinese American<br>N=1134    | Before & After Study | Media Campaign<br>Grass roots community outreach                                                                                                                       | Significant increase in stated intention to donate in the intervention area vs. the control area                                                              | Joining a donor registry<br><br>Express a desire to become an organ donor<br><br>Communicating wishes to family | Not mentioned             |

1  
2  
3  
4  
5  
6  
7  
8  
9  
10  
11  
12  
13  
14  
15  
16  
17  
18  
19  
20  
21  
22  
23  
24  
25  
26  
27  
28  
29  
30  
31  
32  
33  
34  
35  
36  
37  
38  
39  
40  
41  
42  
43  
44  
45  
46  
47  
48  
49

**Table 2: Quality Assessment of included studies**

| Authors                                              | Theoretical quality      | Standardisation of delivery                                                                                                                      | Identification & adjustment for confounders | Effects attributable to the intervention                                 |
|------------------------------------------------------|--------------------------|--------------------------------------------------------------------------------------------------------------------------------------------------|---------------------------------------------|--------------------------------------------------------------------------|
| A Warrens, personal communication, 2013              | Minimally grounded       | Authors allow for & explain variation in intervention delivery.<br>Standard training offered to educators delivering intervention                | No                                          | Yes                                                                      |
| Allen and Stillwater 2010 [20]                       | Minimally grounded       | Authors indicate variation                                                                                                                       | No                                          | Uncertain                                                                |
| Alvaro, Jones et al. 2006 [24]                       | Moderately grounded      | Strict standardisation (by due of intervention design)                                                                                           | No                                          | Uncertain                                                                |
| Alvaro, Siegel et al. 2011 [17]                      | Well grounded            | Strict standardisation – authors undertook un announced site visits, and developed standard reporting tools for completion at intervention sites | No                                          | Yes                                                                      |
| Andrews, Zhang et al. 2012 [10]                      | Moderately grounded      | Authors indicate variation                                                                                                                       | Yes                                         | Yes                                                                      |
| Arriola, Robinson et al. 2009 [11]                   | Well grounded            | Strict standardisation                                                                                                                           | Yes                                         | Yes                                                                      |
| Callender, Hall et al. 2001 [18]                     | Well grounded            | Authors indicate variation                                                                                                                       | Yes                                         | Yes                                                                      |
| Cárdenas, Thornton et al. 2010 [15]                  | Moderately grounded      | Strict standardisation                                                                                                                           | Yes                                         | Yes                                                                      |
| Daryl Thornton, Alejandro-Rodriguez et al. 2012 [14] | No theoretical grounding | Strict standardisation                                                                                                                           | Yes                                         | Yes                                                                      |
| Fahrenwald, Belitz et al. 2010 [21]                  | Well grounded            | Strict standardisation                                                                                                                           | No                                          | Yes                                                                      |
| Feeley, Anker et al. 2009 [16]                       | Moderately grounded      | Authors allow for & explain variation                                                                                                            | No                                          | Yes- Effects on student campaigners<br>No – effect on wider student body |

|                                     |                     |                                                                                                                                |     |           |
|-------------------------------------|---------------------|--------------------------------------------------------------------------------------------------------------------------------|-----|-----------|
| Frates, Bohrer et al. 2006 [22]     | Moderately grounded | Strict standardisation (due to intervention design)                                                                            | No  | Uncertain |
| Harrison, Morgan et al. 2011 [12]   | Well grounded       | Strict standardisation of media and print info. Variation but no explanation or assessment of variation interpersonal elements | No  | Yes       |
| Hebert, Rivera et al. 2010 [25]     | Moderately grounded | Strict standardisation (due to intervention design)                                                                            | No  | Uncertain |
| Radosevich, Larson et al. 2010 [13] | Moderately grounded | Strict standardisation due to intervention design)                                                                             | No  | Uncertain |
| Resnicow, Andrews et al. 2010 [9]   | Moderately grounded | Strict standardisation. Standard training offered to educators delivering intervention                                         | Yes | Yes       |
| Salim, Berry et al. 2011 [23]       | Minimally grounded  | Strict standardisation (due to intervention design)                                                                            | Yes | Uncertain |
| Salim, Bery et al. 2012 [19]        | Minimally grounded  | Strict standardisation                                                                                                         | No  | Yes       |

1  
2  
3  
4  
5  
6  
7  
8  
9  
10  
11  
12  
13  
14  
15  
16  
17  
18  
19  
20  
21  
22  
23  
24  
25  
26  
27  
28  
29  
30  
31  
32  
33  
34  
35  
36  
37  
38  
39  
40  
41  
42  
43  
44  
45  
46  
47  
48  
49

**Table 3: Absolute difference (95% CI) between intervention and control groups for verified registration across ethnic groups**

| Study                                                | Target population/Setting                                                                   | Intervention                                                                                                                | African American             | Hispanic      |
|------------------------------------------------------|---------------------------------------------------------------------------------------------|-----------------------------------------------------------------------------------------------------------------------------|------------------------------|---------------|
|                                                      |                                                                                             |                                                                                                                             | Absolute Difference (CI 95%) |               |
| <sup>1</sup> Resnicow, Andrews et al. 2010 [9]       | <b>African American Setting:</b> Hair Dressers,                                             | <b>Intervention:</b> brief motivational intervention delivered by hairdresser                                               | <b>2.8 (2.2 to 3.2)</b>      |               |
| Daryl Thornton, Alejandro-Rodriguez et al. 2012 [14] | <b>All ethnic groups including white Setting:</b> outside motor Vehicle registration office | <b>Intervention:</b> 5 min video addressing ethnic concerns about OD                                                        | <b>22 (9 to 35)</b>          | 29 (-8 to 65) |
| Andrews, Zhang et al. 2012 [10]                      | <b>African American Setting:</b> African American Churches                                  | <b>Intervention:</b> Focused discussions about donation followed by a DVD aimed at African American concerns about donation | <b>18.7 (16.6 to 20.8)</b>   |               |

<sup>1</sup> This study also reported the intervention group were 1.7 times more likely to report being signed up to a donor register after adjustment for a range of socio-demographic and attitudinal factors (pre-test attitude scores, city, age, sex, insurance group, education and clustering by salon), however this result was not statistically significant.

**Table 4: Educational interventions reporting change in knowledge about organ donation**

| Study                               | Target population                   | Duration and length of follow up post intervention | Number of items with a significant improvement at post test | % items where significant increase in knowledge recorded |
|-------------------------------------|-------------------------------------|----------------------------------------------------|-------------------------------------------------------------|----------------------------------------------------------|
| Cárdenas, Thornton et al. 2010 [15] | High School Students, Multi ethnic. | 60 mins Immediate follow-up                        | 12/16                                                       | 75%                                                      |
| Callender, Hall et al. 2001 [18]    | Multi ethnic adults                 | Not reported Immediate follow-up                   | 4/8                                                         | 50%                                                      |
| Salim, Bery et al. 2012, USA [19]   | Hispanic Adults                     | 45-60mins                                          | 15/25                                                       | 60%                                                      |

1  
2  
3  
4  
5  
6  
7  
8  
9  
10  
11  
12  
13  
14  
15  
16  
17  
18  
19  
20  
21  
22  
23  
24  
25  
26  
27  
28  
29  
30  
31  
32  
33  
34  
35  
36  
37  
38  
39  
40  
41  
42  
43  
44  
45  
46  
47  
48  
49

**Figure 1: Data base search strategy**

| Database, Years Searched<br>Date Range, Keywords Added | Search Strategy                                                                                                                                                                                                                                                                                                                                                                                                                                                                                                                                                                                                                                                                                                                                                                                                                                                                                                                                                                                                                                                                                                                                                                                                                                                                                                                                                                                                                                                                                                                                                                                                                                                                                                                                                                                                                                                                                                                                                                            |
|--------------------------------------------------------|--------------------------------------------------------------------------------------------------------------------------------------------------------------------------------------------------------------------------------------------------------------------------------------------------------------------------------------------------------------------------------------------------------------------------------------------------------------------------------------------------------------------------------------------------------------------------------------------------------------------------------------------------------------------------------------------------------------------------------------------------------------------------------------------------------------------------------------------------------------------------------------------------------------------------------------------------------------------------------------------------------------------------------------------------------------------------------------------------------------------------------------------------------------------------------------------------------------------------------------------------------------------------------------------------------------------------------------------------------------------------------------------------------------------------------------------------------------------------------------------------------------------------------------------------------------------------------------------------------------------------------------------------------------------------------------------------------------------------------------------------------------------------------------------------------------------------------------------------------------------------------------------------------------------------------------------------------------------------------------------|
| Medline<br>OVID<br>1980-2012                           | <ol style="list-style-type: none"> <li>1. randomized controlled trial/ or clinical trial/ or controlled clinical trial/ or multicenter study/ or single blind method/ or double blind method/ or random allocation/ or chi square distribution/ or control groups/ or Cross-Sectional Studies/ or Cohort Studies/</li> <li>2. (randomized controlled trial or controlled clinical trial or multicenter study).pt.</li> <li>3. (random adj2 allocat*).tw.</li> <li>4. (control* adj2 (clinical or group* or trial* or study or studies or design* or methods or random*)).ti,ab.</li> <li>5. ((multicent* or multi-cent* or multisite? or multi-site?) adj (study or studies or trial*)).ti,ab.</li> <li>6. (random* or quasi* or "before and after").ti,ab.</li> <li>7. randomized controlled trials as topic/ or clinical trials as topic/</li> <li>8. ((single or double or treble or triple) adj (blind* or mask*)).tw.</li> <li>9. chi-square?.ti,ab.</li> <li>10. Chi-Square Distribution/</li> <li>11. Research Design/</li> <li>12. Matched-Pair Analysis/</li> <li>13. matched pair*.ti,ab.</li> <li>14. Meta-Analysis/</li> <li>15. meta analy*.ti,ab.</li> <li>16. "Outcome Assessment (Health Care)"/</li> <li>17. (outcome* stud* or intervention* stud*).ti,ab.</li> <li>18. Intervention Studies/</li> <li>19. follow up studies/ or pilot projects/ or prospective studies/</li> <li>20. Evaluation Studies as Topic/</li> <li>21. Evaluation Studies/</li> <li>22. (effective adj3 intervention*).ti,ab.</li> <li>23. (evaluat* adj3 intervention*).ti,ab.</li> <li>24. (outcome* adj3 measure*).ti,ab.</li> <li>25. primary outcome*.ti,ab.</li> <li>26. secondary outcome*.ti,ab.</li> <li>27. Comparative Study/</li> <li>28. evaluat*.tw.</li> <li>29. or/1-28</li> <li>30. exp "Tissue and Organ Procurement"/</li> <li>31. ((cadaver or deceased or dead) adj2 (donor* or donat*)).ti,ab.</li> <li>32. ((organ or organs) adj3 (donor* or donat*)).ti,ab.</li> </ol> |

- 1  
2  
3  
4  
5  
6  
7  
8  
9  
10  
11  
12  
13  
14  
15  
16  
17  
18  
19  
20  
21  
22  
23  
24  
25  
26  
27  
28  
29  
30  
31  
32  
33  
34  
35  
36  
37  
38  
39  
40  
41  
42  
43  
44  
45  
46  
47  
48  
49
- |                                                                                                                                                                                                                                                                                                                                                                                                                                                                                                         |
|---------------------------------------------------------------------------------------------------------------------------------------------------------------------------------------------------------------------------------------------------------------------------------------------------------------------------------------------------------------------------------------------------------------------------------------------------------------------------------------------------------|
| 33. ((cadaver or deceased) adj2 (donat* or donor*)).ti,ab.                                                                                                                                                                                                                                                                                                                                                                                                                                              |
| 34. ((postmortem or post mortem) adj2 (donat* or donor*)).ti,ab.                                                                                                                                                                                                                                                                                                                                                                                                                                        |
| 35. ("organ donor" or "organ donors" or "organ donation").ti,ab.                                                                                                                                                                                                                                                                                                                                                                                                                                        |
| 36. or/30-35                                                                                                                                                                                                                                                                                                                                                                                                                                                                                            |
| 37. Indians, North American/                                                                                                                                                                                                                                                                                                                                                                                                                                                                            |
| 38. African Americans/ or Asian Americans/                                                                                                                                                                                                                                                                                                                                                                                                                                                              |
| 39. "native american*".tw.                                                                                                                                                                                                                                                                                                                                                                                                                                                                              |
| 40. (race or racial or ethnic* or native american* or native canadian* or native alaskan* or american indian* or canadian indian* or amerind* or negro* or afro* or african* or black or blacks or arab* or asian* or chinese or japanese or oriental* or thai* or philipino* or filipino* or taiwanese* or indian* or bengali* or kashmiri* or gujarati* or tamil* or bangladeshi* or pakistani* or sri lankan* or hispanic* or latino* or nonwhite* or non-white* or multiracial or multi-racial).tw. |
| 41. Hispanic Americans/                                                                                                                                                                                                                                                                                                                                                                                                                                                                                 |
| 42. Mexican Americans/                                                                                                                                                                                                                                                                                                                                                                                                                                                                                  |
| 43. ethnic groups/                                                                                                                                                                                                                                                                                                                                                                                                                                                                                      |
| 44. (culture or cultural or faith* or relig* or sikh* or hindu* or muslim* or islam* or christian* or catholic* or judaism or jew* or buddhis* or jehovah* or evangelical or evangelist* or adventist* or pentacostal).tw.                                                                                                                                                                                                                                                                              |
| 45. Minority Groups/                                                                                                                                                                                                                                                                                                                                                                                                                                                                                    |
| 46. Continental Population Groups/                                                                                                                                                                                                                                                                                                                                                                                                                                                                      |
| 47. Asian Continental Ancestry Group/                                                                                                                                                                                                                                                                                                                                                                                                                                                                   |
| 48. Asian Continental Ancestry Group/ or African Continental Ancestry Group/ or Ethnic Groups/                                                                                                                                                                                                                                                                                                                                                                                                          |
| 49. british asian*.tw.                                                                                                                                                                                                                                                                                                                                                                                                                                                                                  |
| 50. british african*.tw.                                                                                                                                                                                                                                                                                                                                                                                                                                                                                |
| 51. or/37-50                                                                                                                                                                                                                                                                                                                                                                                                                                                                                            |
| 52. 29 and 36 and 51                                                                                                                                                                                                                                                                                                                                                                                                                                                                                    |
| 53. (consent* adj3 (increas* or accept* or participat* or encourag* or facilitat* or influenc* or promot* or chang* or focus* or motivat*)).tw.                                                                                                                                                                                                                                                                                                                                                         |
| 54. informed consent/                                                                                                                                                                                                                                                                                                                                                                                                                                                                                   |
| 55. cultural competency/                                                                                                                                                                                                                                                                                                                                                                                                                                                                                |
| 56. decision making/                                                                                                                                                                                                                                                                                                                                                                                                                                                                                    |
| 57. Communication/ or Communication Barriers/                                                                                                                                                                                                                                                                                                                                                                                                                                                           |
| 58. Communications Media/                                                                                                                                                                                                                                                                                                                                                                                                                                                                               |
| 59. (media or message* or communicat* or television or radio or broadcast* or internet or campaign* or program* or leaflet* or questionnaire* or literature or pamphlet* or resource*).tw.                                                                                                                                                                                                                                                                                                              |
| 60. ((register* or registration) adj3 (increas* or accept* or encourag* or facilitat* or influenc* or promot* or chang* or focus* or motivat*)).tw.                                                                                                                                                                                                                                                                                                                                                     |
| 61. ((register* or registration or registry or registries) adj3 (increas* or                                                                                                                                                                                                                                                                                                                                                                                                                            |

1  
2  
3  
4  
5  
6  
7  
8  
9  
10  
11  
12  
13  
14  
15  
16  
17  
18  
19  
20  
21  
22  
23  
24  
25  
26  
27  
28  
29  
30  
31  
32  
33  
34  
35  
36  
37  
38  
39  
40  
41  
42  
43  
44  
45  
46  
47  
48  
49

|  |                                                                                                                                                                                                                                                                                                                                                                                                                                                                                                                                                                                                                                                                                                                                                                                                                                                                                                                                                                                                                                                                                                                 |
|--|-----------------------------------------------------------------------------------------------------------------------------------------------------------------------------------------------------------------------------------------------------------------------------------------------------------------------------------------------------------------------------------------------------------------------------------------------------------------------------------------------------------------------------------------------------------------------------------------------------------------------------------------------------------------------------------------------------------------------------------------------------------------------------------------------------------------------------------------------------------------------------------------------------------------------------------------------------------------------------------------------------------------------------------------------------------------------------------------------------------------|
|  | <p>accept* or encourag* or facilitat* or influenc* or promot* or chang* or focus* or motivat*).tw.</p> <p>62. (intervention* or multiintervention* or multi-intervention* or postintervention* or post-intervention* or preintervention* or pre-intervention*).tw.</p> <p>63. Patient Education Handout/ or Health Education/ or Education/ or Patient Education as Topic/</p> <p>64. Patient Participation/ or intention/</p> <p>65. Attitude to Health/</p> <p>66. Health Knowledge, Attitudes, Practice/</p> <p>67. "Attitude of Health Personnel"/</p> <p>68. Health Personnel/ed [Education]</p> <p>69. Health Policy/ or "Delivery of Health Care"/</p> <p>70. (policy or policies or practice or practices).tw.</p> <p>71. or/53-70</p> <p>72. 29 and 36 and 51 and 71</p> <p>73. ("tissue donor" or "tissue donors" or "tissue donation").tw.</p> <p>74. 72 not 73</p> <p>75. *living donors/</p> <p>76. 74 not 75</p> <p>Added line 77 as a double safety check to see if the live donor papers included any live and dead donors – 2 selected.</p> <p>77. 74 not 76</p> <p>78. from 77 keep 16,30</p> |
|--|-----------------------------------------------------------------------------------------------------------------------------------------------------------------------------------------------------------------------------------------------------------------------------------------------------------------------------------------------------------------------------------------------------------------------------------------------------------------------------------------------------------------------------------------------------------------------------------------------------------------------------------------------------------------------------------------------------------------------------------------------------------------------------------------------------------------------------------------------------------------------------------------------------------------------------------------------------------------------------------------------------------------------------------------------------------------------------------------------------------------|



Figure 2: Selection of studies for inclusion in systematic review of interventions to increase organ donor registration among ethnic minority populations

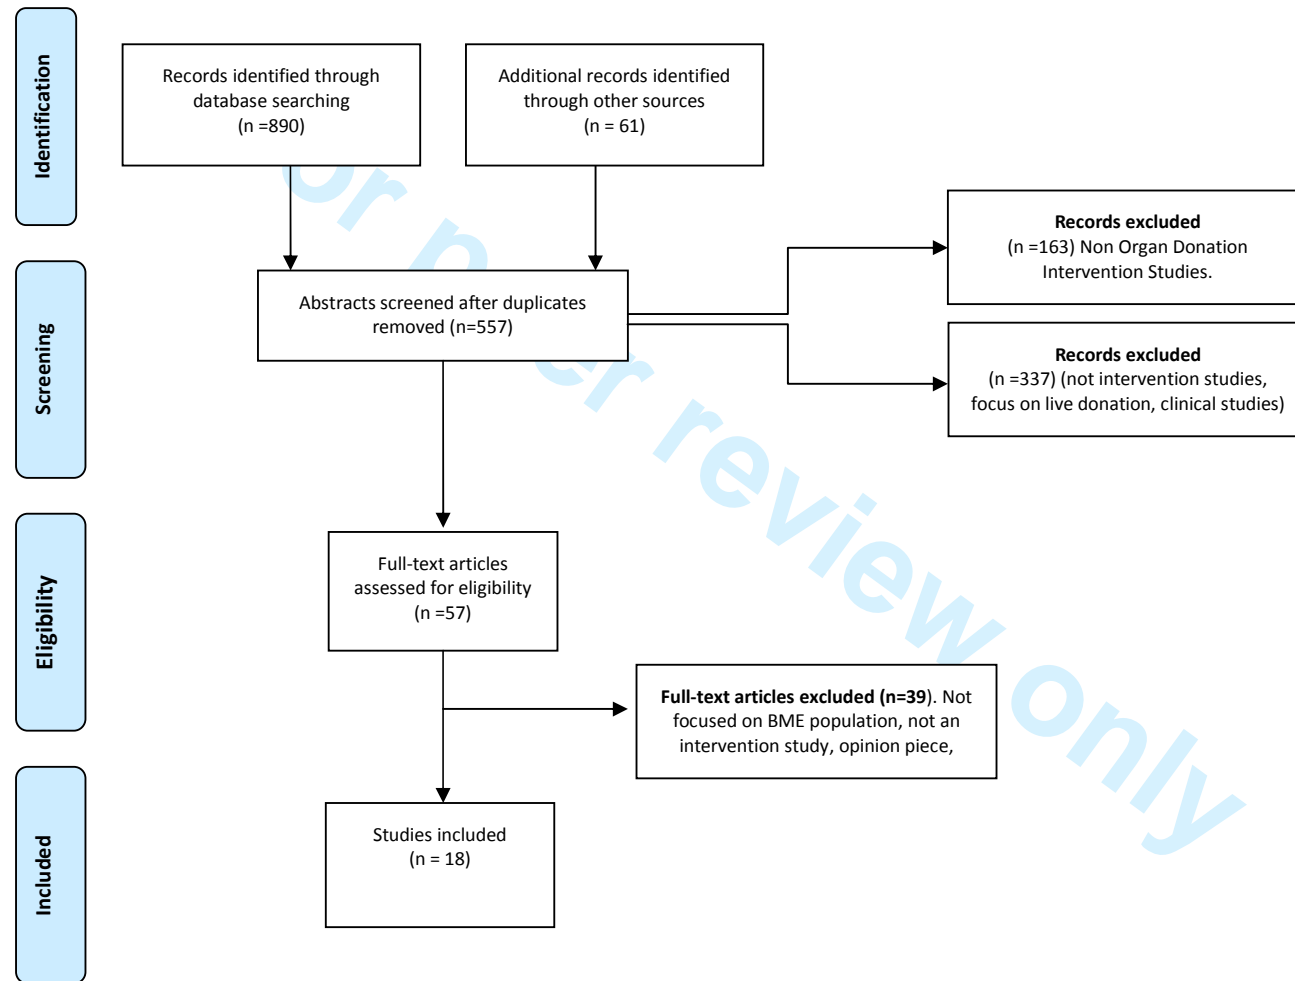

1  
2  
3  
4  
5  
6  
7  
8  
9  
10  
11  
12  
13  
14  
15  
16  
17  
18  
19  
20  
21  
22  
23  
24  
25  
26  
27  
28  
29  
30  
31  
32  
33  
34  
35  
36  
37  
38  
39  
40  
41  
42  
43  
44  
45  
46  
47  
48  
49

For peer review only

**Box 1: Quality Assessment Criteria**

- **Theoretical quality:** Do the authors demonstrate a grounded theoretical understanding of how the intervention causes change? (Was the intervention informed by a literature review and either an established theoretical framework or empirical investigation conducted by the authors?)
- **Standardisation:** Was the delivery of the intervention standardised? If not, did authors allow for and explain variations?
- **Identification & adjustment for confounders:** Were potential confounders sought & adjusted for in the analysis
- **Effects attributable to intervention:** Was it reasonably likely the observed effects were attributable to the intervention?

**Box 2: The Stages of Change**

- **Precontemplation:** Have not considered registering as an organ donor
- **Contemplation:** Considered organ donation, but not taken steps towards registration or addressing unresolved issues/concerns.
- **Preparation:** Able to recognise the benefits of registration and have taken action to find out more.
- **Action:** Expressed their wishes about donation by either signing the organ donor register or discussed wishes with immediate family/kin.
- **Maintenance:** occasionally reinforce statement of wishes to family members/kin.

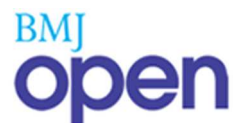

**What are effective approaches to increasing rates of organ donor registration among ethnic minority populations; a systematic review.**

|                                 |                                                                                                                                                                                                                                                 |
|---------------------------------|-------------------------------------------------------------------------------------------------------------------------------------------------------------------------------------------------------------------------------------------------|
| Journal:                        | <i>BMJ Open</i>                                                                                                                                                                                                                                 |
| Manuscript ID:                  | bmjopen-2013-003453.R1                                                                                                                                                                                                                          |
| Article Type:                   | Research                                                                                                                                                                                                                                        |
| Date Submitted by the Author:   | 04-Sep-2013                                                                                                                                                                                                                                     |
| Complete List of Authors:       | Deedat, Sarah; King's College London, Primary Care & Public Health Sciences<br>Kenten, Charlotte; King's College London, Primary Care & Public Health Sciences<br>Morgan, Myfanwy; King's College London, Primary Care & Public Health Sciences |
| <b>Primary Subject Heading</b>: | Public health                                                                                                                                                                                                                                   |
| Secondary Subject Heading:      | Health policy, Health services research, Public health                                                                                                                                                                                          |
| Keywords:                       | Organisation of health services < HEALTH SERVICES ADMINISTRATION & MANAGEMENT, Transplant medicine < INTERNAL MEDICINE, End stage renal failure < NEPHROLOGY                                                                                    |
|                                 |                                                                                                                                                                                                                                                 |

SCHOLARONE™  
Manuscripts

Only

1  
2  
3  
4  
5  
6  
7  
8  
9  
10  
11  
12  
13  
14  
15  
16  
17  
18  
19  
20  
21  
22  
23  
24  
25  
26  
27  
28  
29  
30  
31  
32  
33  
34  
35  
36  
37  
38  
39  
40  
41  
42  
43  
44  
45  
46  
47  
48  
49  
50  
51  
52  
53  
54  
55  
56  
57  
58  
59  
60

What are effective approaches to increasing rates of organ donor registration among ethnic minority populations; a systematic review.

**Competing Interests:** none of the authors have any competing interests. No financial relationships with any organisations that might have an interest in the submitted work in the previous three years, no other relationships or activities that could appear to have influenced the submitted work.

**Abstract**

**Objectives:** To identify effective interventions to increase organ donor registration and improve knowledge about organ donation among ethnic minorities in North America and the UK.

**Design:** Systematic Review

**Data Sources:** Medline, Embase, Psychinfo, Cinahl and Cochrane Central searched to November 2012, together with four trials databases and grey literature.

**Review methods:** A systematic search and assessment of eligibility and quality was undertaken. This was followed by an interpretive and thematic approach to synthesis that examined the nature and delivery of interventions in relation to a range of outcomes: verified registration, changing knowledge and measured shift towards greater readiness.

**Results:** 18 studies were included in the review, comprising both educational and mass media interventions. Mass media interventions alone reported no significant change in intention or willingness to register. Educational or combined approaches were more effective in increasing registration rates, with a strong interpersonal component and an immediate opportunity to register identified as important characteristics in successful change.

**Conclusion:** Effective interventions need to be matched to the populations' stage of readiness to register. Measured outcomes should include both registration and shifts along the pathway towards this behavioural outcome.

**Key Words:** ethnicity, organ donor registration, organ donation, systematic review, intervention studies, UK, North America

Abstract: 186

**What is already known on this topic?**

- Minority ethnic groups have a relatively high need for organ transplantation, particularly kidney transplantation, but low donation rates and availability of well matched organs.
- Campaigns to increase organ donor registration have had limited effects.

**What this study adds**

- Community based education campaigns are more effective than media campaigns alone in increasing organ donor registration.
- Interventions need to be targeted to the populations' stage of readiness to register as a donor.
- The outcome of registering as a donor should be complemented by assessment of shifts along the pathway towards achieving this goal, with increased knowledge and attitudinal changes forming necessary stages towards registration.

## Background

There has been increasing debate in the UK regarding the merits of a potential shift towards a system of presumed consent for deceased organ donation to close the gap between the supply of organs for transplant and the numbers of organs required to meet increasing demand [1]. This gap is particularly significant for members of ethnic minority populations. In the UK Black and South Asian individuals constitute 8.4% of the population [2], but represent 4% of organ donors for whom ethnicity is recorded and 20% of the active kidney transplant waiting list [3]. Similarly in the USA African Americans account for 13% of the population but constitute 34% of those waiting for a kidney [4], while overall ethnic minorities account for 56.3% of those waiting for a transplant in the US [5].

The high level of unmet need for transplantation among British and American ethnic minority populations is influenced by both increased risks of end stage renal failure and thus a high need for kidney transplantation, together with the relatively low donation rate among minority ethnic groups which is of particular significance given the greater prevalence among minority ethnic groups of blood groups and human leukocyte antigen (HLA) types that are less common in the general population. The donation rate among minority ethnic groups has in turn been shown to be influenced by a number of modifiable barriers, including lack of knowledge of the need for donors and how to register as a donor, less favourable cultural and religious beliefs, and a lack of trust in health professionals and the fairness of the organ allocation system[6].

The UK's Organ Donation Taskforce recognised an urgent need to identify and implement the most effective methods to promote organ donation and registration to the public generally and ethnic minority populations specifically [7]. However, despite mass media campaigns and some community engagement activities, the proportion of the population on the Organ Donor Register has only increased from 25% in 2008 to 30% in 2012, while the actual number of minority ethnic registrants remains small[8]

This review systematically assesses the best available evidence to determine the effectiveness of interventions designed to improve rates of registration and address poor knowledge to donation among ethnic minority populations. It also examines issues of implementation and seeks to identify how, where and under what conditions a particular approach can be implemented to maximum effect.



## Methods

**Systematic search:** The following databases were searched in December 2009 and refreshed in November 2012: Medline, Embase, Psycinfo, Cinahl and Cochrane Central. In addition trials databases were searched for relevant studies and searches for academic and grey literature made using search engines and by hand checking relevant publications and direct contact with experts in the field (Box1).

<<<BOX 1 HERE>>>

The inclusion criteria focused on intervention studies in both North America and the UK that were designed to change rates of registration, intention/willingness to become a donor or to change knowledge about organ donation and focused on visible ethnic minorities (Box 1).

A scoping search was initially run in Medline and then further developed, revised and re-run and subsequently adapted for alternative databases. Ethnicity was defined as a visible [non-white] ethnic minority, with specific ethnic categories being those attributed, with a range of terms required to identify the appropriate ethnic minority populations. Table 1 provides an overview of included studies and the databases from which they were identified.

<<TABLE 1 HERE>>

**Relevance and Quality Assessment:** Following initial de-duplication, 557 papers remained (see Figure 1). Two authors (SD & CK) independently reviewed the title and abstract of all citations identified and applied the exclusion criteria. Where information was not sufficient the full article was retrieved for review. Where interventions were not targeted specifically at ethnic minorities, studies were included if sub group analysis by ethnicity was conducted. Studies were excluded if they did not include original data or reported a meeting abstract only. Papers rejected at this stage were mainly cross sectional studies that did not report an intervention to either increase registration or address knowledge gaps about organ donation in ethnic minority populations.

Two members of the research team independently scored the included papers for quality (SD & MM). Quality assessment was guided by the "Assessment Tool for Quantitative Studies" (<http://www.city.hamilton.on.ca/phcs/EPHPP>), recommended by the Cochrane Handbook for the quality assessment of reviews in public health and health promotion. This tool is applicable to randomised controlled trials, quasi-experimental studies and uncontrolled studies [9] and both content and construct validity have been established [10]. Using this assessment tool five papers

1  
2  
3 were rated as 'strong', having four or more of the six components rated as strong with no weak  
4 ratings, and were all cluster randomised trials. Ten studies were 'moderate' with less than four  
5 components rated as strong and one weak, and three papers had two or more components rated as  
6 'weak' and were scored as such. Critical reflection on the quality review process led us to also  
7 consider complementary criteria set out by the Medical Research Council for the development and  
8 evaluation of complex interventions [11]. In light of this papers were assessed for theoretical quality  
9 in terms how the intervention was expected to cause change, and quality of implementation in  
10 terms of whether there was standardisation of delivery through study design and or facilitator  
11 training (see Table 2).  
12  
13  
14  
15  
16

17  
18 <Insert Table 2>  
19

20  
21 < Fig 1 FLOWCHART HERE>  
22

23 **Data synthesis:** Wide variations in outcomes, populations and study design of included studies  
24 precluded meta-analysis. An interpretive and thematic approach to synthesis was therefore  
25 undertaken and examined both the nature and delivery of interventions and the outcomes achieved.  
26 Studies were initially classified by: date, country, population studied, and intervention type and  
27 study design. The second step involved classifying both media and education interventions in terms  
28 of the aims of the interventions and the outcomes achieved. Thirdly, we examined the relationship  
29 between characteristics of the interventions from the outcomes. Data were extracted into tables  
30 and these were verified by two of the authors (SD and MM).  
31  
32  
33  
34  
35  
36  
37  
38  
39

## 40 Results

### 41 Study Characteristics

42  
43  
44 The 18 included studies were conducted between 1993 and 2012. These either evaluated the effects  
45 of an ethnically targeted mass media campaign or community based education. With the exception  
46 of one UK study, all were undertaken with ethnic minority populations in the USA, mainly African  
47 Americans or Hispanics [12-16]. Whereas most interventions adopted a pre and post evaluation  
48 design (Table 1), studies published since 2009 mainly employed a cluster randomised design [12-14  
49 17 18]. Outcomes assessed were verified registration, self reported registration status or knowledge  
50 about organ donation (see Table 1).  
51  
52  
53  
54  
55  
56  
57  
58  
59  
60

### ***Educational Interventions***

Eleven papers reported educational interventions. Recruitment was through or conducted at places of worship and/or educational establishments, and delivered by a range of individuals including recipient families, trained lay individuals, or organ transplant and procurement staff. Six studies were designed for a specific ethnic group, with the remainder aimed at a multi-ethnic audience (see table2)

**Verified registration:** Three cluster randomised trials reported an outcome of verified enrolment on a donor register [12 13 17]. Two of these studies trained individuals embedded within community settings to deliver the intervention [12 13], with both these interventions having a strong interpersonal element and were delivered in familiar settings of a local church or hairdresser. Peer educators in Andrews' study [13] mostly had a medical background and were involved in a Church Health Committee. They undertook a four-hour training package that comprised general information about organ donation and tips on integrating the topic into church discussions. In Resnicow's study [12] hair stylists were trained over two days with this including practical techniques to facilitate communication (motivational interviewing) and general organ donation information. There were wide variations in the duration of these study interventions: participants in the Church study were exposed over a period of 12 months, while interventions with a hair stylist ran for 1 session per month for four months. In contrast the third intervention in this category did not have a strong interpersonal element, and trialled the use of a 5 minute educational film to address common barriers to organ donation that was targeted at those attending the state vehicle licensing office[17]. Across all three interventions the exposed group were significantly more likely to register than the controls, although the effects of the video intervention among vehicle licensing office attendees were significant for White and African Americans but not Hispanic participants [17], possibly reflecting their small number (n=28).

Three further community educational studies based on a follow-up or cross sectional design reported strategies to increase organ donor registration. Feely et al[19] reported a 1.6% increase in new organ donor registrations following campus led peer education among students from six university campuses in the US that were selected as having a high percentage of minority student enrolment. Similarly, a study in Arizona focused on Hispanics attending a large community event found that advertising and offering an immediate opportunity to register produced significantly greater registration rates compared with the use of a generic slogan and offering general information about organ donation (86% vs. 54%) [20]. A further UK community-based educational intervention study focussed on attendees at a range of venues and community events selected to

1  
2  
3 maximise engagement with BME communities (A Warrens, personal communication, 2013). The  
4 authors report that following discussion with a trained BME Peer Educator and the availability of  
5 facilities for registering, 9% of those not already on the Organ Donor Register joined on the day. The  
6 intervention was also shown to be most effective among those who had previously considered  
7 signing up but who did not know how to go about it. These community educational studies thus  
8 identify important influences on registration as both the individual's prior readiness and access to  
9 registration.  
10  
11  
12  
13

14  
15 <TABLE 3>  
16

17  
18 **Changing Knowledge:** Previous research has shown that knowledge about organ donation is  
19 associated with attitudes, intention to donation and willingness to discuss organ donation intentions  
20 with family [21-23]. Among the included studies Knowledge was assessed by asking participants to  
21 indicate whether a range of statements regarding organ donation were true or false. These studies  
22 conceived knowledge as comprised of five facets; 1) *general knowledge about donation*; 2)  
23 *knowledge of the relevance of donation to ethnic minority population*; 3) *knowledge about the*  
24 *procurement and allocation of organs*; 4) *religious and cultural knowledge about organ donation*;  
25 *and 5) knowledge about the financial costs of organ donation*. Presentations to participants were  
26 delivered by ethnic minority transplant surgeons and donor/recipient families. Interventions tended  
27 to be one-off and commonly lasted one hour, with immediate follow-up questionnaires  
28 administered to participants.  
29  
30  
31  
32  
33  
34  
35

36  
37 Two studies tested the relationship between knowledge about organ donation and willingness to  
38 become an organ donor. These studies found that significant improvements in knowledge increased  
39 willingness among participants to state that they intended to register as a donor. Among Hispanic  
40 participants knowledge relating to the fair allocation of organs were significant independent  
41 predictors of willingness[24] (see table 4), while among a multi ethnic sample of high school  
42 students improvements in composite knowledge scores significantly predicted willingness to  
43 donation organs in the intervention group [18].  
44  
45  
46  
47

48  
49 The remaining two studies assessed a range of knowledge items before and after the delivery of an  
50 educational intervention. In a multi-ethnic sample of adults a significant increase in knowledge was  
51 achieved for half of all knowledge items (see table 4)[25]. Of particular note, African Americans who  
52 comprised 60% of the sample achieved the greatest change post intervention in relation to trust in  
53 doctors when compared to trust scores for other ethnic groups. Overall post intervention,  
54 participants in this study reported being significantly more likely to state that they were willing to  
55  
56  
57  
58  
59  
60

1  
2  
3 donate their own and their families organs after death ( $p < 0.000$ ) [25]. Unlike the aforementioned  
4 studies which focused on the lay population Allen and Stillwater's [26] holistic interventions  
5 addressed knowledge gaps and misinformation among Alaskan Community Health aides and school  
6 children. The authors do not report detail about individual aspects of knowledge addressed but  
7 report a significant increase in knowledge among both students from 58% to 95% correct ( $p < .0001$ )  
8 and community health practitioners ( $p < .0001$ ).  
9  
10  
11  
12

13 Table 4 shows the number of items where a significant increase in knowledge was observed post  
14 test. All four interventions reported that it is possible to address knowledge deficits among  
15 participants. However no assessment was made about the extent to which gains in knowledge are  
16 maintained and whether increased willingness necessarily results in actual donor registration.  
17  
18  
19

20  
21 <TABLE 4>  
22

23 **Measured shift towards greater readiness:** Two educational interventions were informed by the  
24 Trans Theoretical Model of Behaviour Change (TTM)[27] and measured change in individual's  
25 'readiness to become an organ donor' [14 28]. Both studies aimed to measure change across the  
26 five TTM stages from pre-contemplation to maintenance (Box 2). In Fahrenwald's study 56.9% of  
27 participants progressed to a more advanced stage at post test and none regressed, while Arriola  
28 reported that intervention participants were 1.53 times more likely to be in a later stage of readiness  
29 than control participants.  
30  
31  
32  
33  
34

35 Collaboration with members of the targeted ethnic population was undertaken to ensure the  
36 relevance and acceptability of the intervention. For Arriola et al[14] this involved a specific focus on  
37 religious objections to organ donation, involvement of the church pastors and the use of a well  
38 known gospel choir to present the intervention video, whereas Fahrenwald et al [28] included  
39 respected members of Native American tribes and their storytelling traditions to convey donation  
40 messages. There were significant differences in participant exposure; participants in Arriola's study  
41 were exposed to intervention materials in the home at several time points over a year (e.g. through  
42 video, pamphlets and greetings cards), whereas Fahrenwald's participants received a short  
43 intervention lasting between 30 and 60 minutes that involved watching a video about organ  
44 donation followed by a group discussion.  
45  
46  
47  
48  
49  
50  
51

52 Although these studies provide evidence of positive movement towards readiness to become an  
53 organ donor, sign a donor card or talk to family members about their preferences, whether those at  
54 a later stage of readiness actually signed a donor card is less clear. This issue is reflected in the UK  
55  
56  
57  
58  
59  
60

1  
2  
3 community study where only a small proportion of participants who stated an intention to register  
4 in the future had done so at follow-up (A Warrens, personal communication, 2013).  
5  
6  
7  
8

9 <<<INSERT BOX 2 HERE>>>  
10

### 11 **Mass Media Interventions**

12  
13  
14 All media interventions attempted to detect changes in willingness or intention to join a donor  
15 register or sign a donor card [16 29-32]. However interventions that solely utilised mass media  
16 reported no significant change in intention or willingness to register an organ donor, despite  
17 focusing on a single ethnic group and undertaking formative research in the target population (see  
18 Table 4 below). In contrast, a high level of success was achieved by one study [15] which innovatively  
19 combined mass media techniques with interpersonal communication. This was conducted at the  
20 vehicle licensing office, a setting where individuals are able to join a state donor registry. Harrison et  
21 al set out with the clear aim of focusing on members of the population categorised as *passive*  
22 positives (i.e. those favourable to organ donation but not yet joined the register). To determine the  
23 effect of each component of the intervention on registrations, the campaign occurred in three  
24 stages each lasting 3 months. The interpersonal component of the intervention accounted for the  
25 greatest increase in registrants from 444 in the year prior to 5588 post campaign. Overall, the  
26 combined effect of the intervention components increased donation by 700%.  
27  
28  
29  
30  
31  
32  
33  
34  
35

36 <TABLE 5>  
37  
38  
39  
40

### 41 **Conclusion**

42  
43 This review identified 18 evaluated intervention studies focusing on ethnic minorities that were  
44 either educational in nature, delivered in community settings or disseminated through mass media.  
45 All but one study was conducted in the United States, with possible implications for generalising  
46 findings to different cultural contexts and minority populations. Other limitations of the review arise  
47 from the heterogeneity of study populations, measures and outcome variables, frequent use of  
48 unvalidated measures of knowledge, and limited data on the impact of specific facets of knowledge  
49 on registration or intent to register, thus failing to identify which 'knowledge gaps' are most  
50 important to address and whether this differs between ethnic groups. It is also notable that few  
51 studies explicitly mentioned an attempt to connect with the target population during the  
52 developmental phase and access acceptability. Reporting of important contextual information  
53  
54  
55  
56  
57  
58  
59  
60

1  
2  
3 relating to the interventions was also sparse. Similar limitations of a lack of rigour and theory have  
4 also been noted in a recent review of smoking and obesity related health promotion interventions  
5 adapted for ethnic minority populations [37]. However detailed analysis of both the process and  
6 outcomes allowed us to identify some messages regarding effective approaches for increasing the  
7 acceptability and effectiveness of these interventions.  
8  
9

10  
11 Firstly, community-based educational interventions exhibited a higher level of success in terms of  
12 verified registration than those solely reliant on mass media. Characteristics of interventions that  
13 were successful in increasing registration also tended to comprise a strong interpersonal element  
14 that focused on the particular population's concerns, delivered by members of the local community  
15 in familiar environments, or in a context where individuals are required to make an immediate  
16 decision about donation. In contrast, mass media campaigns designed to promote organ donation to  
17 Hispanic and African American populations did not achieve an increase in registration. However,  
18 there was some evidence that media interventions successfully addressed knowledge gaps and  
19 misconceptions about organ donation [15 30 31].  
20  
21  
22  
23  
24  
25  
26

27 Secondly, there are questions of whether registration always represents an appropriate outcome,  
28 given that ethnic minorities and those from socio-economically deprived backgrounds are  
29 consistently shown to have more negative views, greater concerns and less knowledge about organ  
30 donation and transplantation than the general population [33-35]. Interventions should therefore  
31 consider the intermediary steps that individuals may need to pass before the desired end-point of  
32 registration can be achieved, and to identify clearly at the outset the stage of readiness among the  
33 intervention participants and match interventions accordingly. Moving some sections of the  
34 population from an early stage of increased knowledge to actual registration may therefore require  
35 multiple interventions that reinforce and build upon each other over a period of time. In contrast  
36 people who are further along the pathway and have reached an action stage may only require a  
37 limited 'nudge' or 'prompt' to register as an organ donor, through interventions involving  
38 behavioural prompts, cues to action and, where possible, an immediate opportunity to register.  
39 Indeed our recent findings (under review) from a detailed focus group study of 229 Black and South  
40 Asian participants in London found that the majority of participants possessed extremely limited  
41 knowledge about organ donation, lacking specific knowledge about how to register and the elevated  
42 need for transplant among their ethnic group. While the focus group opened up a dialogue about  
43 donation and registration, it is unlikely that many participants would have been ready to sign up  
44 immediately for a variety of reasons including the need to discuss with their family, and for some  
45 people the desire to seek clarification from faith representatives. This is particularly prescient in the  
46  
47  
48  
49  
50  
51  
52  
53  
54  
55  
56  
57  
58  
59  
60

1  
2  
3 UK as recent data shows 25% of ethnic minority families of potential donors who had formally signed  
4 the donor register refuse assent [38], with current practice being to respect the wishes of the  
5 family regarding donation decisions even if this does not accord with those of the patient.  
6  
7  
8  
9

10  
11 Thirdly, the review suggests that effective interventions for those in the pre-contemplation or  
12 contemplation phase are those undertaken in familiar community settings and delivered by  
13 appropriately trained lay individuals. Lay health promoters in this context have the benefit of an  
14 established rapport with the target population [36] and the potential for gradual delivery of  
15 information that can be reinforced over time.  
16  
17  
18  
19

20  
21  
22 Current efforts to encourage organ donor registration in the UK have largely relied on mass media  
23 campaigns with some 'community engagement'. Although these have not been formally evaluated  
24 there is little evidence of significant changes in overall registration rates. However the present  
25 review suggests these campaigns may have contributed to changes in knowledge, thus producing  
26 some shift along the pathway, although having less effect on registration practices. For the future  
27 there is a need for rigorously conducted studies to assess the impact of specific facets of knowledge  
28 on registration or intent to register. There is also a need to develop robust intervention studies that  
29 take account of the population's readiness to sign the donor register, with approaches ranging from  
30 personal interaction and discussion with members of the lay community and in practice facilitating a  
31 sign up process.  
32  
33  
34  
35  
36  
37  
38  
39  
40  
41

## 42 **ACKNOWLEDGMENTS**

43  
44 This paper presents independent research funded by the National Institute for Health Research  
45 (NIHR) under its Programme Grants for Applied Research Programme (Grant Reference Number RP-  
46 PG-0707-10123). The views expressed in this paper are those of the authors and not necessarily  
47 those of the NHS, the NIHR or the Department of Health.  
48  
49  
50

51 We thank Karen Welch for conducting the systematic search.  
52  
53  
54  
55  
56  
57  
58  
59  
60



## References

1. Hamm D, Tizzard J. Presumed consent for organ donation. *BMJ* 2008;**336**(7638):230-30.
2. Office for National Statistics. Census: Ethnic group (write-in responses), local authorities in England and Wales. 2013 [www.ons.gov.uk/.../census/...census/...england-and-wales/rft-ct0010.xls](http://www.ons.gov.uk/.../census/...census/...england-and-wales/rft-ct0010.xls) (Accessed 10 May 2013)
3. NHS Blood & Transplant. Organ Donation and Transplantation Activity Report 2011-2012. 2012 [http://www.organdonation.nhs.uk/statistics/transplant\\_activity\\_report/current\\_activity\\_reports/ukt/activity\\_report\\_2011\\_12.pdf](http://www.organdonation.nhs.uk/statistics/transplant_activity_report/current_activity_reports/ukt/activity_report_2011_12.pdf) (Accessed 10 May 2013)
4. US Department for Health & Human Services 2011 <http://www.organdonor.gov/whydonate/minorities.html> (Accessed 10 May 2013)
5. US Department of Health & Human Services. 2013 <http://organdonor.gov/minortya/index.html> (accessed 07 August 2013)
6. Morgan M, Kenten C, Deedat S. Attitudes to deceased organ donation and registration as a donor among minority ethnic groups in North America and the UK: a synthesis of quantitative and qualitative research. *Ethn Health* 2013;**18**(4):1-24.
7. Department of Health. *Organs for transplant: A report of the Organ Donation Taskforce*. 2008 <http://www.dh.gov.uk> (Search for: 9291).
8. Sharif A. Prioritising existing donors to receive organs would boost donation from ethnic minorities. *BMJ* 2012;**347**:f0536.
9. Higgins JP, Green S, Collaboration C. *Cochrane handbook for systematic reviews of interventions*: Wiley Online Library, 2008.
10. Jackson N, Waters E. Criteria for the systematic review of health promotion and public health interventions. *Health Promot Int* 2005;**20**(4):367-74.
11. Craig P, Dieppe P, Macintyre S, et al. Developing and evaluating complex interventions: the new Medical Research Council guidance. *BMJ* 2008;**337**:a1655.
12. Resnicow K, Andrews AM, Beach DK, et al. Randomized trial using hair stylists as lay health advisors to increase donation in African Americans. *Ethn Dis* 2010;**20**(3):276-81.
13. Andrews AM, Zhang N, Magee JC, Chapman R, Langford AT, Resnicow K. Increasing donor designation through black churches: results of a randomized trial. *Prog Transplant* 2012;**22**(2):161-7.
14. Arriola K, Robinson DH, Thompson NJ, Perryman JP. Project ACTS: An Intervention to Increase Organ and Tissue Donation Intentions Among African Americans. *Health Educ Behav* 2009;**37**(2):264-74.
15. Harrison TR, Morgan SE, King AJ, Williams EA. Saving lives branch by branch: the effectiveness of driver licensing bureau campaigns to promote organ donor registry sign-ups to African Americans in Michigan. *J Health Commun* 2011;**16**(8):805-19.
16. Radosevich DM, Larson SM, Scott T, Jones C, Tendle W, Gunderson S. The Effectiveness of the Donate Life—African American Campaign in Minneapolis—St. Paul. *Understanding Organ Donation*: Wiley-Blackwell, 2010:64-82.
17. Thornton JD, Alejandro-Rodriguez M, Leon JB, et al. Effect of an iPod video intervention on consent to donate organs: A randomized trial. *Ann Intern Med* 2012;**156**(7):483-90.
18. Cárdenas V, Thornton JD, Wong KA, et al. Effects of classroom education on knowledge and attitudes regarding organ donation in ethnically diverse urban high schools. *Clin Transplant* 2010;**24**(6):784-93.
19. Feeley TH, Anker AE, Watkins B, et al. A peer-to-peer campaign to promote organ donation among racially diverse college students in New York city. *J Natl Med Assoc* 2009;**101**(11):1154-62.
20. Alvaro EM, Siegel JT, Jones SP. Increasing organ donor registration rates by providing an immediate and complete registration opportunity: an experimental assessment of the IIFF model. *Psychol Health Med* 2011;**16**(6):686-94.

- 1
- 2
- 3 21. Horton RL, Horton PJ. A model of willingness to become a potential organ donor. *Soc Sci Med*
- 4 1982 1991;**33**(9):1037-51.
- 5 22. Cantwell M, Clifford C. English nursing and medical students' attitudes towards organ donation. *J*
- 6 *Adv Nurs* 2000;**32**(4):961-68.
- 7 23. Morgan SE, Miller JK. Beyond the organ donor card: the effect of knowledge, attitudes, and
- 8 values on willingness to communicate about organ donation to family members. *J Health*
- 9 *Commun* 2002;**14**(1):121-34.
- 10 24. Salim A, Bery C, Ley EJ, et al. A focused educational program after religious services to improve
- 11 organ donation in Hispanic Americans. *Clin Transplant* 2012;**26**(6):E634-40.
- 12 25. Callender CO, Hall MB, Branch D. An assessment of the effectiveness of the mottep model for
- 13 increasing donation rates and preventing the need for transplantation - Adult findings:
- 14 Program years 1998 and 1999. *Semin Nephrol* 2001;**21**(4):419-28.
- 15 26. Allen MD, Stillwater B. Organ donation and transplantation: A new tradition of sharing for Alaska
- 16 Natives. Siegel, Jason T [Ed]; Alvaro, Eusebio M [Ed] (2010) *Understanding organ donation:*
- 17 *Applied behavioral science perspectives* (pp 83-97) xxii, 368 pp Wiley-Blackwell, 2010.
- 18 27. Prochaska JO, Velicer WF. The transtheoretical model of health behavior change. *Am J Health*
- 19 *Promot* 1997;**12**(1):38-48.
- 20 28. Fahrenwald NL, Belitz C, Keckler A. "tribes sharing life": An organ donation educational
- 21 intervention for american indian tribal college and university students. *West J Nurs Res*
- 22 2011;**33**(7):901-15.
- 23 29. Frates J, Bohrer GG, Thomas D. Promoting organ donation to Hispanics: the role of the media
- 24 and medicine. *J Health Commun* 2006;**11**(7):683-98.
- 25 30. Salim A, Berry C, Ley EJ, et al. Utilizing the media to help increase organ donation in the Hispanic
- 26 American population. *Clin Transplant* 2011;**25**(6):E622-8.
- 27 31. Alvaro EM, Jones SP, Robles AS, et al. Hispanic organ donation: impact of a Spanish-language
- 28 organ donation campaign. *J Natl Med Assoc* 2006;**98**(1):28-35.
- 29 32. Hebert PL, Rivera J, Eng K, et al. Improving Organ Donation in Chinese Communities in New York.
- 30 *Understanding Organ Donation: Wiley-Blackwell, 2010:119-31.*
- 31 33. Morgan M, Hooper R, Mayblin M, et al. Attitudes to kidney donation and registering as a donor
- 32 among ethnic groups in the UK. *J Public Health* 2006;**28**(3):226-34.
- 33 34. Morgan SE, Miller JK, Arasaratnam LA. Similarities and differences between African Americans
- 34 and European Americans attitudes, knowledge, and willingness to communicate about organ
- 35 donation. *J Appl Soc Psychol* 2003(4):693-715.
- 36 35. Rodrigue JR, Cornell DL, Howard RJ. Relationship of exposure to organ donation information to
- 37 attitudes, beliefs, and donation decisions of next of kin. *Prog Transplant* 2009;**19**(2):173-79.
- 38 36. Madigan ME, Smith-Wheelock L, Krein SL. Healthy hair starts with a healthy body: hair stylists as
- 39 lay health advisors to prevent chronic kidney disease. *Prev Chronic Dis* 2007;**4**(3):A64.
- 40 37. Liu J, Davidson E, Bhopal R, et al. Adapting health promotion interventions to meet the needs of
- 41 ethnic minority groups: mixed-methods evidence synthesis. *Health Technol Assess*
- 42 2012;**16**(44):1-469.
- 43 38. NHSBT. One in four denied dying wish - Black and Asian families over-rule loved ones' decision to
- 44 donate organs. Secondary One in four denied dying wish - Black and Asian families over-rule
- 45 loved ones' decision to donate organs 2011.
- 46 <http://www.nhsbt.nhs.uk/news/2011/newsrelease040311.html> (Accessed: 10 August 2013).
- 47
- 48
- 49
- 50
- 51
- 52
- 53
- 54
- 55
- 56
- 57
- 58
- 59
- 60

**Appendix: Search strategy for Medline Ovid, 1980-2012**

| Database, Years Searched     | Search Strategy                                                                                                                                                                                                                                                                                                                                                                                                                                                                                                                                                                                                                                                                                                                                                                                                                                                                                                                                                                                                                                                                                                                                                                                                                                                                                                                                                                                                                                                                                                                                                                                                                                                                                                                                                                                                                                                                                                                                                                                                                                                                                                                                                                                                                                                                                                                                                                                                                                                                                                                                                                                                                                                                                                                                                                                                                                                                                                          |
|------------------------------|--------------------------------------------------------------------------------------------------------------------------------------------------------------------------------------------------------------------------------------------------------------------------------------------------------------------------------------------------------------------------------------------------------------------------------------------------------------------------------------------------------------------------------------------------------------------------------------------------------------------------------------------------------------------------------------------------------------------------------------------------------------------------------------------------------------------------------------------------------------------------------------------------------------------------------------------------------------------------------------------------------------------------------------------------------------------------------------------------------------------------------------------------------------------------------------------------------------------------------------------------------------------------------------------------------------------------------------------------------------------------------------------------------------------------------------------------------------------------------------------------------------------------------------------------------------------------------------------------------------------------------------------------------------------------------------------------------------------------------------------------------------------------------------------------------------------------------------------------------------------------------------------------------------------------------------------------------------------------------------------------------------------------------------------------------------------------------------------------------------------------------------------------------------------------------------------------------------------------------------------------------------------------------------------------------------------------------------------------------------------------------------------------------------------------------------------------------------------------------------------------------------------------------------------------------------------------------------------------------------------------------------------------------------------------------------------------------------------------------------------------------------------------------------------------------------------------------------------------------------------------------------------------------------------------|
| Medline<br>OVID<br>1980-2012 | <ol style="list-style-type: none"> <li>1. randomized controlled trial/ or clinical trial/ or controlled clinical trial/ or multicenter study/ or single blind method/ or double blind method/ or random allocation/ or chi square distribution/ or control groups/ or Cross-Sectional Studies/ or Cohort Studies/</li> <li>2. (randomized controlled trial or controlled clinical trial or multicenter study).pt.</li> <li>3. (random adj2 allocat*).tw.</li> <li>4. (control* adj2 (clinical or group* or trial* or study or studies or design* or methods or random*)).ti,ab.</li> <li>5. ((multicent* or multi-cent* or multisite? or multi-site?) adj (study or studies or trial*)).ti,ab.</li> <li>6. (random* or quasi* or "before and after").ti,ab.</li> <li>7. randomized controlled trials as topic/ or clinical trials as topic/</li> <li>8. ((single or double or treble or triple) adj (blind* or mask*)).tw.</li> <li>9. chi-square?.ti,ab.</li> <li>10. Chi-Square Distribution/</li> <li>11. Research Design/</li> <li>12. Matched-Pair Analysis/</li> <li>13. matched pair*.ti,ab.</li> <li>14. Meta-Analysis/</li> <li>15. meta analy*.ti,ab.</li> <li>16. "Outcome Assessment (Health Care)"/</li> <li>17. (outcome* stud* or intervention* stud*).ti,ab.</li> <li>18. Intervention Studies/</li> <li>19. follow up studies/ or pilot projects/ or prospective studies/</li> <li>20. Evaluation Studies as Topic/</li> <li>21. Evaluation Studies/</li> <li>22. (effective adj3 intervention*).ti,ab.</li> <li>23. (evaluat* adj3 intervention*).ti,ab.</li> <li>24. (outcome* adj3 measure*).ti,ab.</li> <li>25. primary outcome*.ti,ab.</li> <li>26. secondary outcome*.ti,ab.</li> <li>27. Comparative Study/</li> <li>28. evaluat*.tw.</li> <li>29. or/1-28</li> <li>30. exp "Tissue and Organ Procurement"/</li> <li>31. ((cadaver or deceased or dead) adj2 (donor* or donat*)).ti,ab.</li> <li>32. ((organ or organs) adj3 (donor* or donat*)).ti,ab.</li> <li>33. ((cadaver or deceased) adj2 (donat* or donor*)).ti,ab.</li> <li>34. ((postmortem or post mortem) adj2 (donat* or donor*)).ti,ab.</li> <li>35. ("organ donor" or "organ donors" or "organ donation").ti,ab.</li> <li>36. or/30-35</li> <li>37. Indians, North American/</li> <li>38. African Americans/ or Asian Americans/</li> <li>39. "native american*".tw.</li> <li>40. (race or racial or ethnic* or native american* or native canadian* or native alaskan* or american indian* or canadian indian* or amerind* or negro* or afro* or african* or black or blacks or arab* or asian* or chinese or japanese or oriental* or thai* or philipino* or filipino* or taiwanese* or indian* or bengali* or kashmiri* or gujarati* or tamil* or bangladeshi* or pakistani* or sri lankan* or hispanic* or latino* or nonwhite* or non-white* or multiracial or multi-racial).tw.</li> <li>41. Hispanic Americans/</li> </ol> |

|    |                                                                                                                                                                                                                            |
|----|----------------------------------------------------------------------------------------------------------------------------------------------------------------------------------------------------------------------------|
| 1  |                                                                                                                                                                                                                            |
| 2  |                                                                                                                                                                                                                            |
| 3  |                                                                                                                                                                                                                            |
| 4  |                                                                                                                                                                                                                            |
| 5  | 42. Mexican Americans/                                                                                                                                                                                                     |
| 6  | 43. ethnic groups/                                                                                                                                                                                                         |
| 7  | 44. (culture or cultural or faith* or relig* or sikh* or hindu* or muslim* or islam* or christian* or catholic* or judaism or jew* or buddhis* or jehovah* or evangelical or evangelist* or adventist* or pentacostal).tw. |
| 8  | 45. Minority Groups/                                                                                                                                                                                                       |
| 9  | 46. Continental Population Groups/                                                                                                                                                                                         |
| 10 | 47. Asian Continental Ancestry Group/                                                                                                                                                                                      |
| 11 | 48. Asian Continental Ancestry Group/ or African Continental Ancestry Group/ or Ethnic Groups/                                                                                                                             |
| 12 | 49. british asian*.tw.                                                                                                                                                                                                     |
| 13 | 50. british african*.tw.                                                                                                                                                                                                   |
| 14 | 51. or/37-50                                                                                                                                                                                                               |
| 15 | 52. 29 and 36 and 51                                                                                                                                                                                                       |
| 16 | 53. (consent* adj3 (increas* or accept* or participat* or encourag* or facilitat* or influenc* or promot* or chang* or focus* or motivat*)).tw.                                                                            |
| 17 | 54. informed consent/                                                                                                                                                                                                      |
| 18 | 55. cultural competency/                                                                                                                                                                                                   |
| 19 | 56. decision making/                                                                                                                                                                                                       |
| 20 | 57. Communication/ or Communication Barriers/                                                                                                                                                                              |
| 21 | 58. Communications Media/                                                                                                                                                                                                  |
| 22 | 59. (media or message* or communicat* or television or radio or broadcast* or internet or campaign* or program* or leaflet* or questionnaire* or literature or pamphlet* or resource*).tw.                                 |
| 23 | 60. ((register* or registration) adj3 (increas* or accept* or encourag* or facilitat* or influenc* or promot* or chang* or focus* or motivat*)).tw.                                                                        |
| 24 | 61. ((register* or registration or registry or registries) adj3 (increas* or accept* or encourag* or facilitat* or influenc* or promot* or chang* or focus* or motivat*)).tw.                                              |
| 25 | 62. (intervention* or multiintervention* or multi-intervention* or postintervention* or post-intervention* or preintervention* or pre-intervention*).tw.                                                                   |
| 26 | 63. Patient Education Handout/ or Health Education/ or Education/ or Patient Education as Topic/                                                                                                                           |
| 27 | 64. Patient Participation/ or intention/                                                                                                                                                                                   |
| 28 | 65. Attitude to Health/                                                                                                                                                                                                    |
| 29 | 66. Health Knowledge, Attitudes, Practice/                                                                                                                                                                                 |
| 30 | 67. "Attitude of Health Personnel"/                                                                                                                                                                                        |
| 31 | 68. Health Personnel/ed [Education]                                                                                                                                                                                        |
| 32 | 69. Health Policy/ or "Delivery of Health Care"/                                                                                                                                                                           |
| 33 | 70. (policy or policies or practice or practices).tw.                                                                                                                                                                      |
| 34 | 71. or/53-70                                                                                                                                                                                                               |
| 35 | 72. 29 and 36 and 51 and 71                                                                                                                                                                                                |
| 36 | 73. ("tissue donor" or "tissue donors" or "tissue donation").tw.                                                                                                                                                           |
| 37 | 74. 72 not 73                                                                                                                                                                                                              |
| 38 | 75. *living donors/                                                                                                                                                                                                        |
| 39 | 76. 74 not 75                                                                                                                                                                                                              |
| 40 | Added line 77 as a double safety check to see if the live donor papers included any live and dead donors – 2 selected.                                                                                                     |
| 41 | 77. 74 not 76                                                                                                                                                                                                              |
| 42 | 78. from 77 keep 16,30                                                                                                                                                                                                     |
| 43 |                                                                                                                                                                                                                            |
| 44 |                                                                                                                                                                                                                            |
| 45 |                                                                                                                                                                                                                            |
| 46 |                                                                                                                                                                                                                            |
| 47 |                                                                                                                                                                                                                            |
| 48 |                                                                                                                                                                                                                            |
| 49 |                                                                                                                                                                                                                            |
| 50 |                                                                                                                                                                                                                            |
| 51 |                                                                                                                                                                                                                            |
| 52 |                                                                                                                                                                                                                            |
| 53 |                                                                                                                                                                                                                            |
| 54 |                                                                                                                                                                                                                            |
| 55 |                                                                                                                                                                                                                            |
| 56 |                                                                                                                                                                                                                            |
| 57 |                                                                                                                                                                                                                            |
| 58 |                                                                                                                                                                                                                            |
| 59 |                                                                                                                                                                                                                            |
| 60 |                                                                                                                                                                                                                            |

1  
2  
3  
4  
5  
6  
7  
8  
9  
10  
11  
12  
13  
14  
15  
16  
17  
18  
19  
20  
21  
22  
23  
24  
25  
26  
27  
28  
29  
30  
31  
32  
33  
34  
35  
36  
37  
38  
39  
40  
41  
42  
43  
44  
45  
46  
47  
48  
49

Figure 1: Selection of studies for inclusion in systematic review of interventions to increase organ donor registration among ethnic minority populations

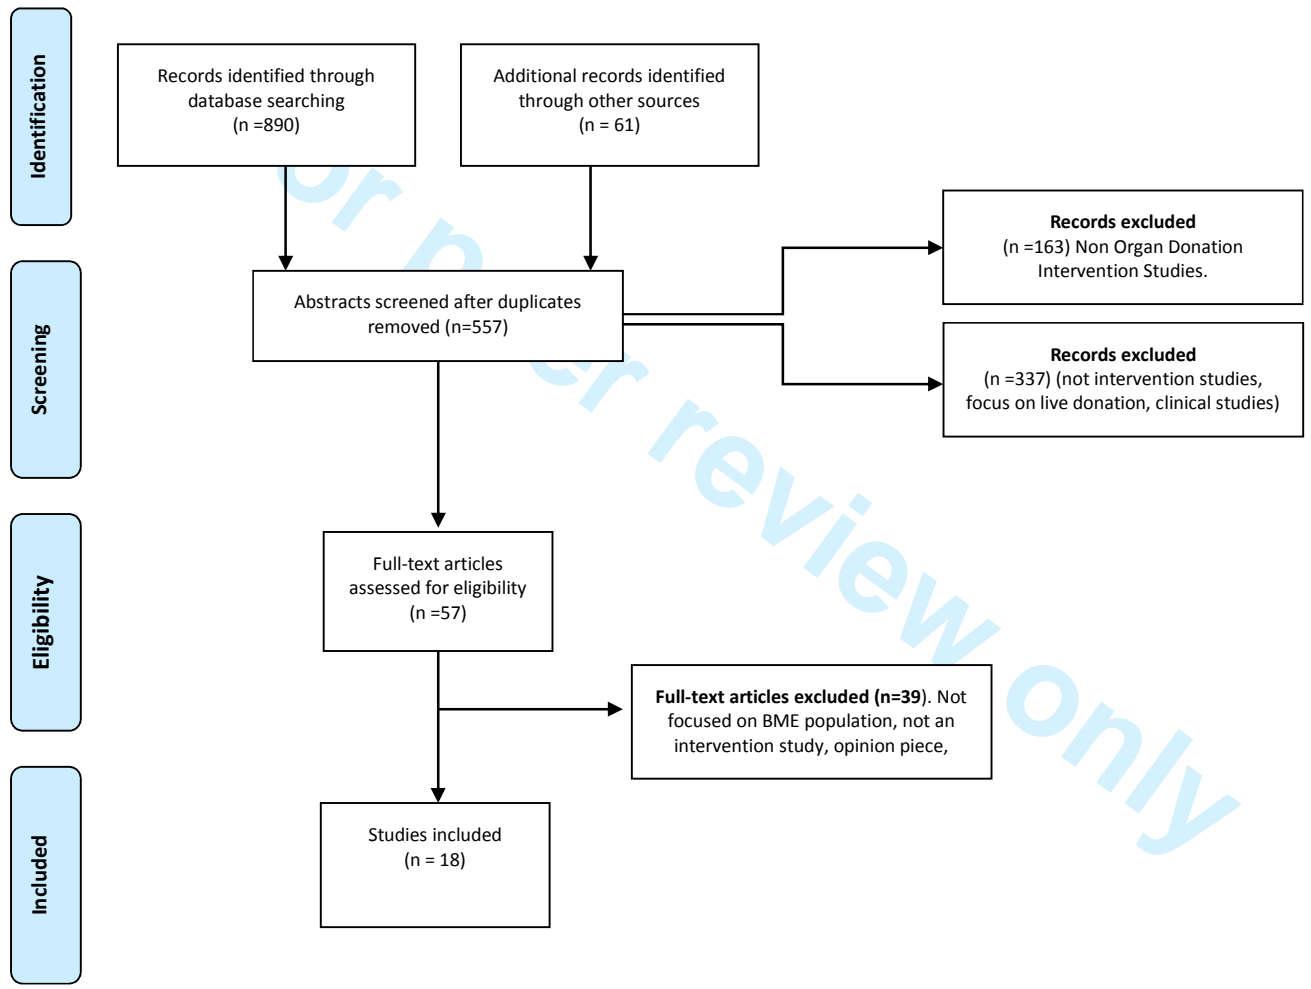

Table 1 – Overview of studies included in the review

| Author & Country                                                              | Demographics Sample Size (n)                       | Study Design               | Mode of delivery                                                                                                                                                                                             | Results                                                                                                                                                 | Outcomes                                                                                                               | Theoretical framework                                                                          | Database            |
|-------------------------------------------------------------------------------|----------------------------------------------------|----------------------------|--------------------------------------------------------------------------------------------------------------------------------------------------------------------------------------------------------------|---------------------------------------------------------------------------------------------------------------------------------------------------------|------------------------------------------------------------------------------------------------------------------------|------------------------------------------------------------------------------------------------|---------------------|
| <b>EDUCATION</b>                                                              |                                                    |                            |                                                                                                                                                                                                              |                                                                                                                                                         |                                                                                                                        |                                                                                                |                     |
| Allen and Stillwater 2010, USA [26]                                           | Alaskan Native N = 54 Health Staff N=<200 Students | Before & After Study       | PowerPoint presentation & video focused on issues about to OD and Alaskan natives                                                                                                                            | Improved knowledge and positive attitude towards donation and intention to register post test                                                           | Knowledge & Intention to register as a donor                                                                           | Not mentioned                                                                                  | Hand search of book |
| Alvaro, Siegel et al. 2011, USA (pertains to study II reported in paper) [20] | Hispanic                                           | Before & After Study       | On alternate weeks employees of local organ procurement organisation offered the attendees at a flea market an immediate opportunity to register or information about organ donation                         | Participants offered an immediate opportunity to register rather than just information about OD were significantly more likely to register (86 vs. 54%) | Verified registration                                                                                                  | The IFF model (Immediate opportunity, information, focused engagement & favourable activation) | Medline             |
| Andrews, Zhang et al. 2012, USA [13]                                          | African American Intervention n=622 Control n=632  | Cluster Randomised         | Members of the congregation undertook discussions with lay health advisors about organ donation. DVD designed to address OD barriers for African Americans                                                   | Increase in verified enrolment on donor registry in intervention group. No increase in knowledge observed                                               | Verified enrolment on donor registry                                                                                   | Not mentioned                                                                                  | PubMed              |
| A Warrens, personal communication, 2013 UK                                    | Multi-ethnic N=806                                 | Cross Sectional Evaluation | Peer educators trained to deliver health promotion about OD                                                                                                                                                  | Increase in the % of people signed up to the organ donor register                                                                                       | Registration                                                                                                           | Not mentioned                                                                                  | Author contact      |
| Callender, Hall et al. 2001, USA [25]                                         | Multi-Ethnic N=914                                 | Before & After Study       | Presentation about organ donation delivered by transplant recipients, donors, individuals on transplant lists health care professionals that are ethnically similar to the target population.                | Improvements in knowledge and attitudes towards organ donation, high reporting of willingness to discuss OD with family                                 | Willingness to donate organs for oneself and loved ones after death<br><br>No valid measures to assess attitudes to OD | Not mentioned                                                                                  | Embase              |
| Thornton JD, Alejandro-Rodríguez et al. 2012, USA [17]                        | Multi Ethnic Intervention n=443 Control n=509      | Cluster Randomised         | 5 minute video about OD prior to collecting drivers licence. Controls obtained licence in the usual manner.                                                                                                  | Cases more likely to register as donors compared to controls. (76% vs 54%)                                                                              | Verified enrolment on donor registry                                                                                   | Not Mentioned                                                                                  | Embase              |
| Fahrenwald, Belitz et al. 2011, USA [28]                                      | American Indians N=1580                            | Before & After Study       | Out-reach coordinators facilitate delivery to small groups. Who were required to read & discuss a 1 page brochure. This was followed by a 13 min video and a group discussion facilitated by the coordinator | Significant change in Stage of Motivational Readiness to become an organ donor post intervention                                                        | Stage of motivational readiness to serve as an organ donor                                                             | Transtheoretical model of behaviour change                                                     | PubMed              |

1  
2  
3  
4  
5  
6  
7  
8  
9  
10  
11  
12  
13  
14  
15  
16  
17  
18  
19  
20  
21  
22  
23  
24  
25  
26  
27  
28  
29  
30  
31  
32  
33  
34  
35  
36  
37  
38  
39  
40  
41  
42  
43  
44  
45  
46  
47  
48  
49

|                                          |                                                     |                      |                                                                                                                                                                                                                      |                                                                                                                               |                                                                                                       |                                            |                             |
|------------------------------------------|-----------------------------------------------------|----------------------|----------------------------------------------------------------------------------------------------------------------------------------------------------------------------------------------------------------------|-------------------------------------------------------------------------------------------------------------------------------|-------------------------------------------------------------------------------------------------------|--------------------------------------------|-----------------------------|
| Resnicow, Andrews et al. 2010, USA [12]  | African American Intervention n=1370 Control n=1419 | Cluster Randomised   | Hairstylists trained as lay health advisors used motivational interviewing to discuss OD with participants                                                                                                           | Participants receiving the intervention were 4 times more likely to join the register than the controls                       | Self reported donation status<br><br>Verified enrolment on state registry                             | Not Mentioned                              | PubMed & Embase             |
| Salim, Bery et al. 2012, USA [24]        | Hispanic N=341                                      | Before & After Study | Presentation about the need for transplant and information about donation lead by local organ procurement organisation                                                                                               | Increase in knowledge, perceptions and beliefs. No difference willingness to discuss donation with family or intent to donate | Change in knowledge and attitude. Donation intent                                                     | Not mentioned                              | PubMed                      |
| Cárdenas, Thornton et al. 2010, USA [18] | Multi-Ethnic Intervention n=96 Control n=91         | Cluster Randomised   | Transplant surgeons & young recipients gave a presentation followed by Q&A session and a video                                                                                                                       | Knowledge increase post intervention was the strongest predictor of positive change in opinion about OD                       | Knowledge, Attitudes & Awareness of OD                                                                | None mentioned                             | Medline                     |
| Feeley, Anker et al. 2009, USA [19]      | Multi-ethnic                                        | Before & After Study | Peer educators delivered a range of campus based activities                                                                                                                                                          | Increased donor registration                                                                                                  | Self reported registration                                                                            | Not mentioned                              | Embase, Medline, PubMed     |
| Arriola, Robinson et al. 2009, USA [14]  | African American Intervention n=175 Control n =162  | Cluster Randomised   | Video & written materials mailed to participants                                                                                                                                                                     | Greater readiness to sign a donor card, register via drivers licence or talk to family about wishes in intervention group     | Readiness to express donation intent via a drivers licence, donor card and discussion with family     | Transtheoretical model of behaviour change | Embase, PubMed & Medline    |
| <b>MEDIA</b>                             |                                                     |                      |                                                                                                                                                                                                                      |                                                                                                                               |                                                                                                       |                                            |                             |
| Alvaro, Jones et al. 2006, USA [31]      | Hispanic N=2401                                     | Before & After Study | 4 x 30 sec Television<br>2x 60sec radio ads. These highlighted positive impact of transplant on Hispanic individuals and demonstrated the substantial efforts medics undertake to save the life of a potential donor | Greater reporting of pro-donation beliefs, and family discussion post intervention                                            | Self reported registration status.<br><br>No validated measures of attitude and willingness to OD     | Not mentioned                              | Embase & Medline            |
| Frates, Bohrer et al. 2006, USA [29]     | Hispanic N=4,500                                    | Before & After Study | Prime time television & radio slots                                                                                                                                                                                  | Year on year increase in Hispanic OD consent rates (overall 10% increase).<br>Increase in knowledge/attitudes                 | Consent rates from organ procurement organisation.<br><br>No valid measures to assess attitudes to OD | Transtheoretical model                     | Embase, Medline & Psychinfo |

|   |                                          |                               |                      |                                                                                                                                                                        |                                                                                                                                                               |                                                                                                                 |                           |                     |
|---|------------------------------------------|-------------------------------|----------------------|------------------------------------------------------------------------------------------------------------------------------------------------------------------------|---------------------------------------------------------------------------------------------------------------------------------------------------------------|-----------------------------------------------------------------------------------------------------------------|---------------------------|---------------------|
| 1 | Salim, Berry et al. 2011, USA [30]       | Hispanic<br>N = 1052          | Before & After Study | Prime time television & radio slots                                                                                                                                    | Improved knowledge post campaign when compared to baseline                                                                                                    | Awareness, perception & belief about OD                                                                         | Not mentioned             | Embase & Medline    |
| 2 | Radosevich, Larson et al. 2010, USA [16] | African American<br>N=465     | Before & After Study | Media Campaign conveyed via television, radio, targeted print media. Donor families and health care professionals were interviewed on television and radio.            | Significant increase in knowledge and attitude about organ donation post campaign<br><br>No significant change in intention and willingness to become a donor | Self Reported Registration<br>Change in Knowledge attitudes and willingness to become a donor                   | Theory of Reasoned Action | Hand search of book |
| 3 | <b>Media &amp; Education</b>             |                               |                      |                                                                                                                                                                        |                                                                                                                                                               |                                                                                                                 |                           |                     |
| 4 | Harrison, Morgan et al. 2011, USA [15]   | African American<br>N=626,771 | Before & After Study | Billboards in the vicinity of vehicle licensing offices, and radio adverts. Placement of donor families at vehicle licensing offices and targeted written information. | Large increase in sign up to the donor register the magnitude of the increase was greatest when 1-1 promotion was combined with other medium                  | Verified registration                                                                                           | Communication design      | PubMed              |
| 5 | Hebert, Rivera et al. 2010, USA [32]     | Chinese American<br>N=1134    | Before & After Study | Media Campaign<br>Grass roots community outreach                                                                                                                       | Significant increase in stated intention to donate in the intervention area vs. the control area                                                              | Joining a donor registry<br><br>Express a desire to become an organ donor<br><br>Communicating wishes to family | Not mentioned             | Hand search of book |



**Table 2: Assessment of included studies based on two components of the Medical Research Council criteria for complex interventions.**

| Authors                                          | Theoretical quality      | Standardisation of delivery                                                                                                                      |
|--------------------------------------------------|--------------------------|--------------------------------------------------------------------------------------------------------------------------------------------------|
| A Warrens, personal communication, 2013          | Minimally grounded       | Authors allow for & explain variation in intervention delivery.<br>Standard training offered to educators delivering intervention                |
| Allen and Stillwater 2010 [26]                   | Minimally grounded       | Authors indicate variation                                                                                                                       |
| Alvaro, Jones et al. 2006 [31]                   | Moderately grounded      | Strict standardisation (by due of intervention design)                                                                                           |
| Alvaro, Siegel et al. 2011 [20]                  | Well grounded            | Strict standardisation – authors undertook un announced site visits, and developed standard reporting tools for completion at intervention sites |
| Andrews, Zhang et al. 2012 [13]                  | Moderately grounded      | Authors indicate variation                                                                                                                       |
| Arriola, Robinson et al. 2009 [14]               | Well grounded            | Strict standardisation                                                                                                                           |
| Callender, Hall et al. 2001 [25]                 | Well grounded            | Authors indicate variation                                                                                                                       |
| Cárdenas, Thornton et al. 2010 [18]              | Moderately grounded      | Strict standardisation                                                                                                                           |
| Thornton,JD Alejandro-Rodriguez et al. 2012 [17] | No theoretical grounding | Strict standardisation                                                                                                                           |
| Fahrenwald, Belitz et al. 2011 [28]              | Well grounded            | Strict standardisation                                                                                                                           |
| Feeley, Anker et al. 2009 [19]                   | Moderately grounded      | Authors allow for & explain variation                                                                                                            |

|                                     |                     |                                                                                                                                |
|-------------------------------------|---------------------|--------------------------------------------------------------------------------------------------------------------------------|
| Frates, Bohrer et al. 2006 [29]     | Moderately grounded | Strict standardisation (due to intervention design)                                                                            |
| Harrison, Morgan et al. 2011 [15]   | Well grounded       | Strict standardisation of media and print info. Variation but no explanation or assessment of variation interpersonal elements |
| Hebert, Rivera et al. 2010 [32]     | Moderately grounded | Strict standardisation (due to intervention design)                                                                            |
| Radosevich, Larson et al. 2010 [15] | Moderately grounded | Strict standardisation due to intervention design)                                                                             |
| Resnicow, Andrews et al. 2010 [12]  | Moderately grounded | Strict standardisation. Standard training offered to educators delivering intervention                                         |
| Salim, Berry et al. 2011 [30]       | Minimally grounded  | Strict standardisation (due to intervention design)                                                                            |
| Salim, Bery et al. 2012 [24]        | Minimally grounded  | Strict standardisation                                                                                                         |

1  
2  
3  
4  
5  
6  
7  
8  
9  
10  
11  
12  
13  
14  
15  
16  
17  
18  
19  
20  
21  
22  
23  
24  
25  
26  
27  
28  
29  
30  
31  
32  
33  
34  
35  
36  
37  
38  
39  
40  
41  
42  
43  
44  
45  
46  
47  
48  
49

**Table 3: Absolute difference (95% CI) between intervention and control groups for verified registration across ethnic groups**

| Study                                             | Target population/Setting                                                                   | Intervention                                                                                                                | African American             | Hispanic      |
|---------------------------------------------------|---------------------------------------------------------------------------------------------|-----------------------------------------------------------------------------------------------------------------------------|------------------------------|---------------|
|                                                   |                                                                                             |                                                                                                                             | Absolute Difference (CI 95%) |               |
| <sup>1</sup> Resnicow, Andrews et al. 2010 [12]   | <b>African American Setting:</b> Hair Dressers,                                             | <b>Intervention:</b> brief motivational intervention delivered by hairdresser                                               | <b>2.8 (2.2 to 3.2)</b>      |               |
| Thornton JD, Alejandro-Rodriguez et al. 2012 [17] | <b>All ethnic groups including white</b> Setting: outside motor Vehicle registration office | <b>Intervention:</b> 5 min video addressing ethnic concerns about OD                                                        | <b>22 (9 to 35)</b>          | 29 (-8 to 65) |
| Andrews, Zhang et al. 2012 [13]                   | <b>African American Setting:</b> African American Churches                                  | <b>Intervention:</b> Focused discussions about donation followed by a DVD aimed at African American concerns about donation | <b>18.7 (16.6 to 20.8)</b>   |               |

<sup>1</sup> This study also reported the intervention group were 1.7 times more likely to report being signed up to a donor register after adjustment for a range of socio-demographic and attitudinal factors (pre-test attitude scores, city, age, sex, insurance group, education and clustering by salon), however this result was not statistically significant.

**Table 4: Educational interventions reporting change in knowledge about organ donation**

| Study                               | Target population                              | Duration and length of follow up post intervention | Number of items with a significant improvement at post test | % items where significant increase in knowledge recorded |                                                                                                                                                                                                                                                                                                                                 |
|-------------------------------------|------------------------------------------------|----------------------------------------------------|-------------------------------------------------------------|----------------------------------------------------------|---------------------------------------------------------------------------------------------------------------------------------------------------------------------------------------------------------------------------------------------------------------------------------------------------------------------------------|
| Cárdenas, Thornton et al. 2010 [18] | High School Students, Multi ethnic.            | 60 mins Immediate follow-up                        | 12/16                                                       | 75%                                                      | Greater improvements in composite knowledge score predicted willingness to donate in the intervention group ( <b>OR1.42, CI 1.18-1.71, p&lt;0.001</b> )                                                                                                                                                                         |
| Callender, Hall et al. 2001 [25]    | Multi ethnic adults                            | Not reported Immediate follow-up                   | 4/8                                                         | 50%                                                      | Significant improvement in 4 knowledge items<br>1) Knowledge about higher rates of kidney disease among BME 2) Longer wait times for transplant for BME 3) less likely to believe doctors would hasten death if they knew donor status of patient 4) Less likely to state that god needs 'whole' bodies for the afterlife       |
| Salim, Bery et al. 2012, USA [24]   | Hispanic Adults                                | 45-60mins                                          | 15/25                                                       | 60%                                                      | <b>Independent positive predictors of willingness to donate:</b><br>1) Knowledge of a national matching system ( <b>AOR 3.36, CI1.43-7.88, p=0.005</b> )<br>2) Not perceiving that wealthy people are more likely to receive a transplant ( <b>AOR 5.39, 2.02-14.37 p=0.0008</b> )                                              |
| Allen & Stillwater, 2010, USA [26]  | Alaskan Natives School Children                | Not specified                                      | n/r                                                         | n/r                                                      | <b>Scores for knowledge about donation and transplantation increased significantly pre-test 58% correct vs 95% post test p&lt;0.001</b><br><b>Students significantly more likely to state they would be a donor p=0.021</b>                                                                                                     |
|                                     | Community Health Aids & Practitioners (adults) | 3 hour presentation as part of CPD.                | n/r                                                         | n/r                                                      | <b>Significant increase in factual knowledge score p&lt;0.001</b> – mean knowledge scores doubled post test.<br><b>Participants were significantly more report intent to sign a donor card post test p=0.003.</b><br><b>Significantly greater awareness of how and where to get information about organ donation p&lt;0.001</b> |

1  
2  
3  
4  
5  
6  
7  
8  
9  
10  
11  
12  
13  
14  
15  
16  
17  
18  
19  
20  
21  
22  
23  
24  
25  
26  
27  
28  
29  
30  
31  
32  
33  
34  
35  
36  
37  
38  
39  
40  
41  
42  
43  
44  
45  
46  
47  
48  
49

Table 5: Effect of media campaigns on donor registration

| Author<br>Target population<br>Language                                 | Media<br>Duration                 | Self reported Registration intention to be a donor                                      | Pre   | Post  | p     |
|-------------------------------------------------------------------------|-----------------------------------|-----------------------------------------------------------------------------------------|-------|-------|-------|
| Frates, Bohrer et al. 2006, USA [29]<br>Hispanic<br>Spanish             | TV & Radio<br>3 years             | <i>Have decided to be a donor</i>                                                       | 27%   | 31%   | 0.163 |
|                                                                         |                                   | <i>Signed a donor card</i>                                                              | 14%   | 16%   | 0.376 |
| Salim, Berry et al. 2011, USA [30]<br>Hispanic<br>English & Spanish     | TV & Radio<br>1 year              | <i>Intent to donate (% likely or very likely)</i>                                       | 32%   | 30%   | 0.488 |
| Radosevich, Larson et al. 2010, USA [16]<br>African American<br>English | TV, Radio & Print Media<br>1 year | <i>Donor designation on drivers licence</i>                                             | 33%   | 40%   | 0.123 |
| Alvaro, Jones et al. 2006, USA [31]<br>Hispanic<br>Spanish              | TV & Radio<br>1 year              | <i>Have you personally told anybody that you would like to be an organ donor (%yes)</i> | 28.5% | 27.2% | 0.723 |
|                                                                         |                                   |                                                                                         | 23.2% | 20.9% | 0.445 |

|                                                                                                |                                                                                                                   |                                                                                                                                        |      |      |              |
|------------------------------------------------------------------------------------------------|-------------------------------------------------------------------------------------------------------------------|----------------------------------------------------------------------------------------------------------------------------------------|------|------|--------------|
| 1<br>2 Hebert, Rivera et al. 2010 [32] <sup>2</sup><br>3 Chinese American<br>4 Not Stated<br>5 | Print Media<br>1 year                                                                                             | <i>I do not intend to donate my organ at my death</i> <sup>3</sup>                                                                     | 11%  | 21%  | 0.001        |
| 6 Harrison, Morgan et al. 2011 [15]<br>7 African American<br>8 English<br>9                    | Bill Boards in the vicinity of vehicle<br>licensing office Radio Ads<br>Face to face contacts with donor families | <i>Verified registration (counts of registrants in postcode areas<br/>                 with a population &gt;80% African American)</i> | 0.1% | 1.2% | <b>0.001</b> |

For peer review only

41 \_\_\_\_\_  
 42 <sup>2</sup> During this campaign a major scandal reported that a funeral home near to the intervention location had been procuring tissue from cadavers without family consent. This story was covered on national and  
 43 local media.  
 44  
 45

**Box 1: Systematic Search****1. Sources**

**Databases Searched:** Medline (Ovid), Embase (Ovid), PsychInfo (Ovid), Cinahl (Ebso), Cochrane Central Pubmed

**Trials Databases Searched:**

UKCRN, ClincialTrials.gov, WHO international Clinical Trials Registry Platform and Health Service Research Projects in Progress.

**Websites Searched for Grey Literature:**

National Health Service Blood & Transplant - [www.nhsbt.nhs.uk](http://www.nhsbt.nhs.uk)

Department of Health (UK) – [www.dh.gov.uk](http://www.dh.gov.uk)

Kidney Research (UK) – [www.kidneyresearch.org.uk](http://www.kidneyresearch.org.uk)

US Department of Transplant (funded studies) <http://www.organdonor.gov/dtcp/behavior.html>

**2. Inclusion Criteria:**

**Country:** UK, USA

**Date of Publication:** 1980 – 2012

**Ethnicity:** Visible Ethnic Minority

**Design:** Intervention study, Evaluation study

**Outcomes:** Verified registration, willingness/intent to register, change in registration rates

**Subjects:** Adults and School age children

**Setting:** Community

**Box 2: Prochaska's Stages of Change [27] adapted for Organ Donation.**

- **Precontemplation:** Have not considered registering as an organ donor
- **Contemplation:** Considered organ donation, but not taken steps towards registration or addressing unresolved issues/concerns.
- **Preparation:** Able to recognise the benefits of registration and have taken action to find out more.
- **Action:** Expressed their wishes about donation by either signing the organ donor register or discussed wishes with immediate family/kin.
- **Maintenance:** occasionally reinforce statement of wishes to family members/kin.

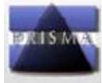

# PRISMA 2009 Checklist

| Section/topic                      | #  | Checklist item                                                                                                                                                                                                                                                                                              | Reported on page # |
|------------------------------------|----|-------------------------------------------------------------------------------------------------------------------------------------------------------------------------------------------------------------------------------------------------------------------------------------------------------------|--------------------|
| <b>TITLE</b>                       |    |                                                                                                                                                                                                                                                                                                             |                    |
| Title                              | 1  | Identify the report as a systematic review, meta-analysis, or both.                                                                                                                                                                                                                                         | 1                  |
| <b>ABSTRACT</b>                    |    |                                                                                                                                                                                                                                                                                                             |                    |
| Structured summary                 | 2  | Provide a structured summary including, as applicable: background; objectives; data sources; study eligibility criteria, participants, and interventions; study appraisal and synthesis methods; results; limitations; conclusions and implications of key findings; systematic review registration number. | 2                  |
| <b>INTRODUCTION</b>                |    |                                                                                                                                                                                                                                                                                                             |                    |
| Rationale                          | 3  | Describe the rationale for the review in the context of what is already known.                                                                                                                                                                                                                              | 4                  |
| Objectives                         | 4  | Provide an explicit statement of questions being addressed with reference to participants, interventions, comparisons, outcomes, and study design (PICOS).                                                                                                                                                  | 4                  |
| <b>METHODS</b>                     |    |                                                                                                                                                                                                                                                                                                             |                    |
| Protocol and registration          | 5  | Indicate if a review protocol exists, if and where it can be accessed (e.g., Web address), and, if available, provide registration information including registration number.                                                                                                                               | -                  |
| Eligibility criteria               | 6  | Specify study characteristics (e.g., PICOS, length of follow-up) and report characteristics (e.g., years considered, language, publication status) used as criteria for eligibility, giving rationale.                                                                                                      | 5                  |
| Information sources                | 7  | Describe all information sources (e.g., databases with dates of coverage, contact with study authors to identify additional studies) in the search and date last searched.                                                                                                                                  | 4&5                |
| Search                             | 8  | Present full electronic search strategy for at least one database, including any limits used, such that it could be repeated.                                                                                                                                                                               | Appendix p 16      |
| Study selection                    | 9  | State the process for selecting studies (i.e., screening, eligibility, included in systematic review, and, if applicable, included in the meta-analysis).                                                                                                                                                   | 5                  |
| Data collection process            | 10 | Describe method of data extraction from reports (e.g., piloted forms, independently, in duplicate) and any processes for obtaining and confirming data from investigators.                                                                                                                                  | 6&7                |
| Data items                         | 11 | List and define all variables for which data were sought (e.g., PICOS, funding sources) and any assumptions and simplifications made.                                                                                                                                                                       | 6&7                |
| Risk of bias in individual studies | 12 | Describe methods used for assessing risk of bias of individual studies (including specification of whether this was done at the study or outcome level), and how this information is to be used in any data synthesis.                                                                                      | 6                  |
| Summary measures                   | 13 | State the principal summary measures (e.g., risk ratio, difference in means).                                                                                                                                                                                                                               | n/a                |
| Synthesis of results               | 14 | Describe the methods of handling data and combining results of studies, if done, including measures of consistency (e.g., $I^2$ For each meta-analysis. <a href="http://bmjopen.bmj.com/site/about/guidelines.xhtml">http://bmjopen.bmj.com/site/about/guidelines.xhtml</a> )                               | n/a                |



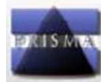

## PRISMA 2009 Checklist

Page 1 of 2

| Section/topic                 | #  | Checklist item                                                                                                                                                                                           | Reported on page # |
|-------------------------------|----|----------------------------------------------------------------------------------------------------------------------------------------------------------------------------------------------------------|--------------------|
| Risk of bias across studies   | 15 | Specify any assessment of risk of bias that may affect the cumulative evidence (e.g., publication bias, selective reporting within studies).                                                             | -                  |
| Additional analyses           | 16 | Describe methods of additional analyses (e.g., sensitivity or subgroup analyses, meta-regression), if done, indicating which were pre-specified.                                                         | n/a                |
| <b>RESULTS</b>                |    |                                                                                                                                                                                                          |                    |
| Study selection               | 17 | Give numbers of studies screened, assessed for eligibility, and included in the review, with reasons for exclusions at each stage, ideally with a flow diagram.                                          | fig 1 p6           |
| Study characteristics         | 18 | For each study, present characteristics for which data were extracted (e.g., study size, PICOS, follow-up period) and provide the citations.                                                             | table 1 p6         |
| Risk of bias within studies   | 19 | Present data on risk of bias of each study and, if available, any outcome level assessment (see item 12).                                                                                                | -                  |
| Results of individual studies | 20 | For all outcomes considered (benefits or harms), present, for each study: (a) simple summary data for each intervention group (b) effect estimates and confidence intervals, ideally with a forest plot. | Tables 3 & 5       |
| Synthesis of results          | 21 | Present results of each meta-analysis done, including confidence intervals and measures of consistency.                                                                                                  | n/a                |
| Risk of bias across studies   | 22 | Present results of any assessment of risk of bias across studies (see Item 15).                                                                                                                          | -                  |
| Additional analysis           | 23 | Give results of additional analyses, if done (e.g., sensitivity or subgroup analyses, meta-regression [see Item 16]).                                                                                    | n/a                |
| <b>DISCUSSION</b>             |    |                                                                                                                                                                                                          |                    |
| Summary of evidence           | 24 | Summarize the main findings including the strength of evidence for each main outcome; consider their relevance to key groups (e.g., healthcare providers, users, and policy makers).                     | 11-13              |
| Limitations                   | 25 | Discuss limitations at study and outcome level (e.g., risk of bias), and at review-level (e.g., incomplete retrieval of identified research, reporting bias).                                            | 11-13              |
| Conclusions                   | 26 | Provide a general interpretation of the results in the context of other evidence, and implications for future research.                                                                                  | 11-13              |
| <b>FUNDING</b>                |    |                                                                                                                                                                                                          |                    |
| Funding                       | 27 | Describe sources of funding for the systematic review and other support (e.g., supply of data); role of funders for the systematic review.                                                               | 14                 |

From: Moher D, Liberati A, Tetzlaff J, Altman DG, The PRISMA Group (2009). Preferred Reporting Items for Systematic Reviews and Meta-Analyses: The PRISMA Statement. PLoS Med 6(6): e1000097. doi:10.1371/journal.pmed1000097

For more information, visit: [www.prisma-statement.org](http://www.prisma-statement.org).

For peer review only - <http://bmjopen.bmj.com/site/about/guidelines.xhtml>

1  
2  
3 What are effective approaches to increasing rates of organ donor registration among ethnic  
4 minority populations; a systematic review.  
5  
6  
7  
8  
9  
10  
11  
12

13  
14 **Competing Interests:** none of the authors have any competing interests. No financial relationships  
15 with any organisations that might have an interest in the submitted work in the previous three  
16 years, no other relationships or activities that could appear to have influenced the submitted work.  
17  
18  
19  
20  
21  
22  
23  
24  
25  
26  
27  
28  
29  
30  
31  
32  
33  
34  
35  
36  
37  
38  
39  
40  
41  
42  
43  
44  
45  
46  
47  
48  
49  
50  
51  
52  
53  
54  
55  
56  
57  
58  
59  
60

**Abstract**

**Objectives:** To identify effective interventions to increase organ donor registration and improve knowledge about organ donation among ethnic minorities in North America and the UK.

**Design:** Systematic Review

**Data Sources:** Medline, Embase, Psychinfo, Cinahl and Cochrane Central searched to November 2012, together with four trials databases and grey literature.

**Review methods:** A systematic search and assessment of eligibility and quality was undertaken. This was followed by an interpretive and thematic approach to synthesis that examined the nature and delivery of interventions in relation to a range of outcomes: verified registration, changing knowledge and measured shift towards greater readiness.

**Results:** 18 studies were included in the review, comprising both educational and mass media interventions. Mass media interventions alone reported no significant change in intention or willingness to register. Educational or combined approaches were more effective in increasing registration rates, with a strong interpersonal component and an immediate opportunity to register identified as important characteristics in successful change.

**Conclusion:** Effective interventions need to be matched to the populations' stage of readiness to register. Measured outcomes should include both registration and shifts along the pathway towards this behavioural outcome.

**Key Words:** ethnicity, organ donor registration, organ donation, systematic review, intervention studies, UK, North America

Abstract: 186

**What is already known on this topic?**

- Minority ethnic groups have a relatively high need for organ transplantation, particularly kidney transplantation, but low donation rates and availability of well matched organs.
- Campaigns to increase organ donor registration have had limited effects.

**What this study adds**

- Community based education campaigns are more effective than media campaigns alone in increasing organ donor registration.
- Interventions need to be targeted to the populations' stage of readiness to register as a donor.
- The outcome of registering as a donor should be complemented by assessment of shifts along the pathway towards achieving this goal, with increased knowledge and attitudinal changes forming necessary stages towards registration.

## Background

There has been increasing debate in the UK regarding the merits of a potential shift towards a system of presumed consent for deceased organ donation to close the gap between the supply of organs for transplant and the numbers of organs required to meet increasing demand [1]. This gap is particularly significant for members of ethnic minority populations. In the UK Black and South Asian individuals constitute 8.4% of the population [2], but represent 4% of organ donors for whom ethnicity is recorded and 20% of the active kidney transplant waiting list [3]. Similarly in the USA African Americans account for 13% of the population but constitute 34% of those waiting for a kidney [4], while overall ethnic minorities account for 56.3% of those waiting for a transplant in the US [5].

The high level of unmet need for transplantation among British and American ethnic minority populations is influenced by both increased risks of end stage renal failure and thus a high need for kidney transplantation, together with the relatively low donation rate among minority ethnic groups which is of particular significance given the greater prevalence among minority ethnic groups of blood groups and human leukocyte antigen (HLA) types that are less common in the general population. The donation rate among minority ethnic groups has in turn been shown to be influenced by a number of modifiable barriers, including lack of knowledge of the need for donors and how to register as a donor, less favourable cultural and religious beliefs, and a lack of trust in health professionals and the fairness of the organ allocation system[6].

The UK's Organ Donation Taskforce recognised an urgent need to identify and implement the most effective methods to promote organ donation and registration to the public generally and ethnic minority populations specifically [7]. However, despite mass media campaigns and some community engagement activities, the proportion of the population on the Organ Donor Register has only increased from 25% in 2008 to 30% in 2012, while the actual number of minority ethnic registrants remains small[8]

This review systematically assesses the best available evidence to determine the effectiveness of interventions designed to improve rates of registration and address poor knowledge to donation among ethnic minority populations. It also examines issues of implementation and seeks to identify how, where and under what conditions a particular approach can be implemented to maximum effect.

## Methods

**Systematic search:** The following databases were searched in December 2009 and refreshed in November 2012: Medline, Embase, Psycinfo, Cinahl and Cochrane Central. In addition trials databases were searched for relevant studies and searches for academic and grey literature made using search engines and by hand checking relevant publications and direct contact with experts in the field (Box1).

<<<BOX 1 HERE>>>

The inclusion criteria focused on intervention studies in both North America and the UK that were designed to change rates of registration, intention/willingness to become a donor or to change knowledge about organ donation and focused on visible ethnic minorities (Box 1).

A scoping search was initially run in Medline and then further developed, revised and re-run and subsequently adapted for alternative databases. Ethnicity was defined as a visible [non-white] ethnic minority, with specific ethnic categories being those attributed, with a range of terms required to identify the appropriate ethnic minority populations. Table 1 provides an overview of included studies and the databases from which they were identified.

<<TABLE 1 HERE>>

**Relevance and Quality Assessment:** Following initial de-duplication, 557 papers remained (see Figure 1). Two authors (SD & CK) independently reviewed the title and abstract of all citations identified and applied the exclusion criteria. Where information was not sufficient the full article was retrieved for review. Where interventions were not targeted specifically at ethnic minorities, studies were included if sub group analysis by ethnicity was conducted. Studies were excluded if they did not include original data or reported a meeting abstract only. Papers rejected at this stage were mainly cross sectional studies that did not report an intervention to either increase registration or address knowledge gaps about organ donation in ethnic minority populations.

Two members of the research team independently scored the included papers for quality (SD & MM). Quality assessment was guided by the "Assessment Tool for Quantitative Studies" (<http://www.city.hamilton.on.ca/phcs/EPHPP>), recommended by the Cochrane Handbook for the quality assessment of reviews in public health and health promotion. This tool is applicable to randomised controlled trials, quasi-experimental studies and uncontrolled studies [9] and both content and construct validity have been established [10]. Using this assessment tool five papers

1  
2  
3 were rated as 'strong', having four or more of the six components rated as strong with no weak  
4 ratings, and were all cluster randomised trials. Ten studies were 'moderate' with less than four  
5 components rated as strong and one weak, and three papers had two or more components rated as  
6 'weak' and were scored as such. Critical reflection on the quality review process led us to also  
7 consider complementary criteria set out by the Medical Research Council for the development and  
8 evaluation of complex interventions [11]. In light of this papers were assessed for theoretical quality  
9 in terms how the intervention was expected to cause change, and quality of implementation in  
10 terms of whether there was standardisation of delivery through study design and or facilitator  
11 training (see Table 2).  
12  
13  
14  
15  
16  
17

18 <Insert Table 2>  
19

20 < Fig 1 FLOWCHART HERE>  
21  
22

23 **Data synthesis:** Wide variations in outcomes, populations and study design of included studies  
24 precluded meta-analysis. An interpretive and thematic approach to synthesis was therefore  
25 undertaken and examined both the nature and delivery of interventions and the outcomes achieved.  
26 Studies were initially classified by: date, country, population studied, and intervention type and  
27 study design. The second step involved classifying both media and education interventions in terms  
28 of the aims of the interventions and the outcomes achieved. Thirdly, we examined the relationship  
29 between characteristics of the interventions from the outcomes. Data were extracted into tables  
30 and these were verified by two of the authors (SD and MM).  
31  
32  
33  
34  
35  
36  
37  
38  
39

## 40 Results

### 41 Study Characteristics

42 The 18 included studies were conducted between 1993 and 2012. These either evaluated the effects  
43 of an ethnically targeted mass media campaign or community based education. With the exception  
44 of one UK study, all were undertaken with ethnic minority populations in the USA, mainly African  
45 Americans or Hispanics [12-16]. Whereas most interventions adopted a pre and post evaluation  
46 design (Table 1), studies published since 2009 mainly employed a cluster randomised design [12-14  
47 17 18]. Outcomes assessed were verified registration, self reported registration status or knowledge  
48 about organ donation (see Table 1).  
49  
50  
51  
52  
53  
54  
55  
56  
57  
58  
59  
60

### ***Educational Interventions***

Eleven papers reported educational interventions. Recruitment was through or conducted at places of worship and/or educational establishments, and delivered by a range of individuals including recipient families, trained lay individuals, or organ transplant and procurement staff. Six studies were designed for a specific ethnic group, with the remainder aimed at a multi-ethnic audience (see table2)

**Verified registration:** Three cluster randomised trials reported an outcome of verified enrolment on a donor register [12 13 17]. Two of these studies trained individuals embedded within community settings to deliver the intervention [12 13], with both these interventions having a strong interpersonal element and were delivered in familiar settings of a local church or hairdresser. Peer educators in Andrews' study [13] mostly had a medical background and were involved in a Church Health Committee. They undertook a four-hour training package that comprised general information about organ donation and tips on integrating the topic into church discussions. In Resnicow's study [12] hair stylists were trained over two days with this including practical techniques to facilitate communication (motivational interviewing) and general organ donation information. There were wide variations in the duration of these study interventions: participants in the Church study were exposed over a period of 12 months, while interventions with a hair stylist ran for 1 session per month for four months. In contrast the third intervention in this category did not have a strong interpersonal element, and trialled the use of a 5 minute educational film to address common barriers to organ donation that was targeted at those attending the state vehicle licensing office[17]. Across all three interventions the exposed group were significantly more likely to register than the controls, although the effects of the video intervention among vehicle licensing office attendees were significant for White and African Americans but not Hispanic participants [17], possibly reflecting their small number (n=28).

Three further community educational studies based on a follow-up or cross sectional design reported strategies to increase organ donor registration. Feely et al[19] reported a 1.6% increase in new organ donor registrations following campus led peer education among students from six university campuses in the US that were selected as having a high percentage of minority student enrolment. Similarly, a study in Arizona focused on Hispanics attending a large community event found that advertising and offering an immediate opportunity to register produced significantly greater registration rates compared with the use of a generic slogan and offering general information about organ donation (86% vs. 54%) [20]. A further UK community-based educational intervention study focussed on attendees at a range of venues and community events selected to



1  
2  
3 maximise engagement with BME communities (A Warrens, personal communication, 2013). The  
4 authors report that following discussion with a trained BME Peer Educator and the availability of  
5 facilities for registering, 9% of those not already on the Organ Donor Register joined on the day. The  
6 intervention was also shown to be most effective among those who had previously considered  
7 signing up but who did not know how to go about it. These community educational studies thus  
8 identify important influences on registration as both the individual's prior readiness and access to  
9 registration.  
10  
11  
12  
13

14  
15 <TABLE 3>  
16

17  
18 **Changing Knowledge:** Previous research has shown that knowledge about organ donation is  
19 associated with attitudes, intention to donation and willingness to discuss organ donation intentions  
20 with family [21-23]. Among the included studies Knowledge was assessed by asking participants to  
21 indicate whether a range of statements regarding organ donation were true or false. These studies  
22 conceived knowledge as comprised of five facets; 1) *general knowledge about donation*; 2)  
23 *knowledge of the relevance of donation to ethnic minority population*; 3) *knowledge about the*  
24 *procurement and allocation of organs*; 4) *religious and cultural knowledge about organ donation*;  
25 *and 5) knowledge about the financial costs of organ donation*. Presentations to participants were  
26 delivered by ethnic minority transplant surgeons and donor/recipient families. Interventions tended  
27 to be one-off and commonly lasted one hour, with immediate follow-up questionnaires  
28 administered to participants.  
29  
30  
31  
32  
33  
34

35  
36 Two studies tested the relationship between knowledge about organ donation and willingness to  
37 become an organ donor. These studies found that significant improvements in knowledge increased  
38 willingness among participants to state that they intended to register as a donor. Among Hispanic  
39 participants knowledge relating to the fair allocation of organs were significant independent  
40 predictors of willingness[24] (see table 4), while among a multi ethnic sample of high school  
41 students improvements in composite knowledge scores significantly predicted willingness to  
42 donation organs in the intervention group [18].  
43  
44  
45  
46  
47

48  
49 The remaining two studies assessed a range of knowledge items before and after the delivery of an  
50 educational intervention. In a multi-ethnic sample of adults a significant increase in knowledge was  
51 achieved for half of all knowledge items (see table 4)[25]. Of particular note, African Americans who  
52 comprised 60% of the sample achieved the greatest change post intervention in relation to trust in  
53 doctors when compared to trust scores for other ethnic groups. Overall post intervention,  
54 participants in this study reported being significantly more likely to state that they were willing to  
55  
56  
57  
58  
59  
60

1  
2  
3 donate their own and their families organs after death ( $p < 0.000$ ) [25]. Unlike the aforementioned  
4 studies which focused on the lay population Allen and Stillwater's [26] holistic interventions  
5 addressed knowledge gaps and misinformation among Alaskan Community Health aides and school  
6 children. The authors do not report detail about individual aspects of knowledge addressed but  
7 report a significant increase in knowledge among both students from 58% to 95% correct ( $p < .0001$ )  
8 and community health practitioners ( $p < .0001$ ).  
9  
10  
11  
12

13 Table 4 shows the number of items where a significant increase in knowledge was observed post  
14 test. All four interventions reported that it is possible to address knowledge deficits among  
15 participants. However no assessment was made about the extent to which gains in knowledge are  
16 maintained and whether increased willingness necessarily results in actual donor registration.  
17  
18  
19

20  
21 <TABLE 4>  
22

23 **Measured shift towards greater readiness:** Two educational interventions were informed by the  
24 Trans Theoretical Model of Behaviour Change (TTM)[27] and measured change in individual's  
25 'readiness to become an organ donor' [14 28]. Both studies aimed to measure change across the  
26 five TTM stages from pre-contemplation to maintenance (Box 2). In Fahrenwald's study 56.9% of  
27 participants progressed to a more advanced stage at post test and none regressed, while Arriola  
28 reported that intervention participants were 1.53 times more likely to be in a later stage of readiness  
29 than control participants.  
30  
31  
32  
33  
34

35 Collaboration with members of the targeted ethnic population was undertaken to ensure the  
36 relevance and acceptability of the intervention. For Arriola et al[14] this involved a specific focus on  
37 religious objections to organ donation, involvement of the church pastors and the use of a well  
38 known gospel choir to present the intervention video, whereas Fahrenwald et al [28] included  
39 respected members of Native American tribes and their storytelling traditions to convey donation  
40 messages. There were significant differences in participant exposure; participants in Arriola's study  
41 were exposed to intervention materials in the home at several time points over a year (e.g. through  
42 video, pamphlets and greetings cards), whereas Fahrenwald's participants received a short  
43 intervention lasting between 30 and 60 minutes that involved watching a video about organ  
44 donation followed by a group discussion.  
45  
46  
47  
48  
49  
50  
51

52 Although these studies provide evidence of positive movement towards readiness to become an  
53 organ donor, sign a donor card or talk to family members about their preferences, whether those at  
54 a later stage of readiness actually signed a donor card is less clear. This issue is reflected in the UK  
55  
56  
57  
58  
59  
60

1  
2  
3 community study where only a small proportion of participants who stated an intention to register  
4 in the future had done so at follow-up (A Warrens, personal communication, 2013).  
5  
6  
7  
8

9 <<<INSERT BOX 2 HERE>>>

### 10 11 **Mass Media Interventions**

12  
13  
14 All media interventions attempted to detect changes in willingness or intention to join a donor  
15 register or sign a donor card [16 29-32]. However interventions that solely utilised mass media  
16 reported no significant change in intention or willingness to register an organ donor, despite  
17 focusing on a single ethnic group and undertaking formative research in the target population (see  
18 Table 4 below). In contrast, a high level of success was achieved by one study [15] which innovatively  
19 combined mass media techniques with interpersonal communication. This was conducted at the  
20 vehicle licensing office, a setting where individuals are able to join a state donor registry. Harrison et  
21 al set out with the clear aim of focusing on members of the population categorised as *passive*  
22 positives (i.e. those favourable to organ donation but not yet joined the register). To determine the  
23 effect of each component of the intervention on registrations, the campaign occurred in three  
24 stages each lasting 3 months. The interpersonal component of the intervention accounted for the  
25 greatest increase in registrants from 444 in the year prior to 5588 post campaign. Overall, the  
26 combined effect of the intervention components increased donation by 700%.  
27  
28  
29  
30  
31  
32  
33  
34  
35

36 <TABLE 5>

### 37 38 39 40 41 **Conclusion**

42  
43 This review identified 18 evaluated intervention studies focusing on ethnic minorities that were  
44 either educational in nature, delivered in community settings or disseminated through mass media.  
45 All but one study was conducted in the United States, with possible implications for generalising  
46 findings to different cultural contexts and minority populations. Other limitations of the review arise  
47 from the heterogeneity of study populations, measures and outcome variables, frequent use of  
48 unvalidated measures of knowledge, and limited data on the impact of specific facets of knowledge  
49 on registration or intent to register, thus failing to identify which 'knowledge gaps' are most  
50 important to address and whether this differs between ethnic groups. It is also notable that few  
51 studies explicitly mentioned an attempt to connect with the target population during the  
52 developmental phase and access acceptability. Reporting of important contextual information  
53  
54  
55  
56  
57  
58  
59  
60

1  
2  
3 relating to the interventions was also sparse. Similar limitations of a lack of rigour and theory have  
4 also been noted in a recent review of smoking and obesity related health promotion interventions  
5 adapted for ethnic minority populations [37]. However detailed analysis of both the process and  
6 outcomes allowed us to identify some messages regarding effective approaches for increasing the  
7 acceptability and effectiveness of these interventions.  
8  
9

10  
11 Firstly, community-based educational interventions exhibited a higher level of success in terms of  
12 verified registration than those solely reliant on mass media. Characteristics of interventions that  
13 were successful in increasing registration also tended to comprise a strong interpersonal element  
14 that focused on the particular population's concerns, delivered by members of the local community  
15 in familiar environments, or in a context where individuals are required to make an immediate  
16 decision about donation. In contrast, mass media campaigns designed to promote organ donation to  
17 Hispanic and African American populations did not achieve an increase in registration. However,  
18 there was some evidence that media interventions successfully addressed knowledge gaps and  
19 misconceptions about organ donation [15 30 31].  
20  
21

22  
23 Secondly, there are questions of whether registration always represents an appropriate outcome,  
24 given that ethnic minorities and those from socio-economically deprived backgrounds are  
25 consistently shown to have more negative views, greater concerns and less knowledge about organ  
26 donation and transplantation than the general population [33-35]. Interventions should therefore  
27 consider the intermediary steps that individuals may need to pass before the desired end-point of  
28 registration can be achieved, and to identify clearly at the outset the stage of readiness among the  
29 intervention participants and match interventions accordingly. Moving some sections of the  
30 population from an early stage of increased knowledge to actual registration may therefore require  
31 multiple interventions that reinforce and build upon each other over a period of time. In contrast  
32 people who are further along the pathway and have reached an action stage may only require a  
33 limited 'nudge' or 'prompt' to register as an organ donor, through interventions involving  
34 behavioural prompts, cues to action and, where possible, an immediate opportunity to register.  
35 Indeed our recent findings (under review) from a detailed focus group study of 229 Black and South  
36 Asian participants in London found that the majority of participants possessed extremely limited  
37 knowledge about organ donation, lacking specific knowledge about how to register and the elevated  
38 need for transplant among their ethnic group. While the focus group opened up a dialogue about  
39 donation and registration, it is unlikely that many participants would have been ready to sign up  
40 immediately for a variety of reasons including the need to discuss with their family, and for some  
41 people the desire to seek clarification from faith representatives. This is particularly prescient in the  
42  
43  
44  
45  
46  
47  
48  
49  
50  
51  
52  
53  
54  
55  
56  
57  
58  
59  
60

1  
2  
3 UK as recent data shows 25% of ethnic minority families of potential donors who had formally signed  
4 the donor register refuse assent [38], with current practice being to respect the wishes of the  
5 family regarding donation decisions even if this does not accord with those of the patient.  
6  
7  
8  
9

10  
11 Thirdly, the review suggests that effective interventions for those in the pre-contemplation or  
12 contemplation phase are those undertaken in familiar community settings and delivered by  
13 appropriately trained lay individuals. Lay health promoters in this context have the benefit of an  
14 established rapport with the target population [36] and the potential for gradual delivery of  
15 information that can be reinforced over time.  
16  
17  
18  
19

20  
21  
22 Current efforts to encourage organ donor registration in the UK have largely relied on mass media  
23 campaigns with some 'community engagement'. Although these have not been formally evaluated  
24 there is little evidence of significant changes in overall registration rates. However the present  
25 review suggests these campaigns may have contributed to changes in knowledge, thus producing  
26 some shift along the pathway, although having less effect on registration practices. For the future  
27 there is a need for rigorously conducted studies to assess the impact of specific facets of knowledge  
28 on registration or intent to register. There is also a need to develop robust intervention studies that  
29 take account of the population's readiness to sign the donor register, with approaches ranging from  
30 personal interaction and discussion with members of the lay community and in practice facilitating a  
31 sign up process.  
32  
33  
34  
35  
36  
37  
38  
39  
40

#### 41 **ACKNOWLEDGMENTS**

42  
43  
44 This paper presents independent research funded by the National Institute for Health Research  
45 (NIHR) under its Programme Grants for Applied Research Programme (Grant Reference Number RP-  
46 PG-0707-10123). The views expressed in this paper are those of the authors and not necessarily  
47 those of the NHS, the NIHR or the Department of Health.  
48  
49  
50

51 We thank Karen Welch for conducting the systematic search.  
52  
53  
54  
55  
56  
57  
58  
59  
60

## References

1. Hamm D, Tizzard J. Presumed consent for organ donation. *BMJ* 2008;**336**(7638):230-30.
2. Office for National Statistics. Census: Ethnic group (write-in responses), local authorities in England and Wales. 2013 [www.ons.gov.uk/.../census/...census/...england-and-wales/rft-ct0010.xls](http://www.ons.gov.uk/.../census/...census/...england-and-wales/rft-ct0010.xls) (Accessed 10 May 2013)
3. NHS Blood & Transplant. Organ Donation and Transplantation Activity Report 2011-2012. 2012 [http://www.organdonation.nhs.uk/statistics/transplant\\_activity\\_report/current\\_activity\\_reports/ukt/activity\\_report\\_2011\\_12.pdf](http://www.organdonation.nhs.uk/statistics/transplant_activity_report/current_activity_reports/ukt/activity_report_2011_12.pdf) (Accessed 10 May 2013)
4. US Department for Health & Human Services 2011 <http://www.organdonor.gov/whydonate/minorities.html> (Accessed 10 May 2013)
5. US Department of Health & Human Services. 2013 <http://organdonor.gov/minortya/index.html> (accessed 07 August 2013)
6. Morgan M, Kenten C, Deedat S. Attitudes to deceased organ donation and registration as a donor among minority ethnic groups in North America and the UK: a synthesis of quantitative and qualitative research. *Ethn Health* 2013;**18**(4):1-24.
7. Department of Health. *Organs for transplant: A report of the Organ Donation Taskforce*. 2008 <http://www.dh.gov.uk> (Search for: 9291).
8. Sharif A. Prioritising existing donors to receive organs would boost donation from ethnic minorities. *BMJ* 2012;**347**:f0536.
9. Higgins JP, Green S, Collaboration C. *Cochrane handbook for systematic reviews of interventions*: Wiley Online Library, 2008.
10. Jackson N, Waters E. Criteria for the systematic review of health promotion and public health interventions. *Health Promot Int* 2005;**20**(4):367-74.
11. Craig P, Dieppe P, Macintyre S, et al. Developing and evaluating complex interventions: the new Medical Research Council guidance. *BMJ* 2008;**337**:a1655.
12. Resnicow K, Andrews AM, Beach DK, et al. Randomized trial using hair stylists as lay health advisors to increase donation in African Americans. *Ethn Dis* 2010;**20**(3):276-81.
13. Andrews AM, Zhang N, Magee JC, Chapman R, Langford AT, Resnicow K. Increasing donor designation through black churches: results of a randomized trial. *Prog Transplant* 2012;**22**(2):161-7.
14. Arriola K, Robinson DH, Thompson NJ, Perryman JP. Project ACTS: An Intervention to Increase Organ and Tissue Donation Intentions Among African Americans. *Health Educ Behav* 2009;**37**(2):264-74.
15. Harrison TR, Morgan SE, King AJ, Williams EA. Saving lives branch by branch: the effectiveness of driver licensing bureau campaigns to promote organ donor registry sign-ups to African Americans in Michigan. *J Health Commun* 2011;**16**(8):805-19.
16. Radosevich DM, Larson SM, Scott T, Jones C, Tendle W, Gunderson S. The Effectiveness of the Donate Life—African American Campaign in Minneapolis—St. Paul. *Understanding Organ Donation*: Wiley-Blackwell, 2010:64-82.
17. Thornton JD, Alejandro-Rodriguez M, Leon JB, et al. Effect of an iPod video intervention on consent to donate organs: A randomized trial. *Ann Intern Med* 2012;**156**(7):483-90.
18. Cárdenas V, Thornton JD, Wong KA, et al. Effects of classroom education on knowledge and attitudes regarding organ donation in ethnically diverse urban high schools. *Clin Transplant* 2010;**24**(6):784-93.
19. Feeley TH, Anker AE, Watkins B, et al. A peer-to-peer campaign to promote organ donation among racially diverse college students in New York city. *J Natl Med Assoc* 2009;**101**(11):1154-62.
20. Alvaro EM, Siegel JT, Jones SP. Increasing organ donor registration rates by providing an immediate and complete registration opportunity: an experimental assessment of the IIFF model. *Psychol Health Med* 2011;**16**(6):686-94.

- 1
- 2
- 3 21. Horton RL, Horton PJ. A model of willingness to become a potential organ donor. *Soc Sci Med*
- 4 1982 1991;**33**(9):1037-51.
- 5 22. Cantwell M, Clifford C. English nursing and medical students' attitudes towards organ donation. *J*
- 6 *Adv Nurs* 2000;**32**(4):961-68.
- 7 23. Morgan SE, Miller JK. Beyond the organ donor card: the effect of knowledge, attitudes, and
- 8 values on willingness to communicate about organ donation to family members. *J Health*
- 9 *Commun* 2002;**14**(1):121-34.
- 10 24. Salim A, Bery C, Ley EJ, et al. A focused educational program after religious services to improve
- 11 organ donation in Hispanic Americans. *Clin Transplant* 2012;**26**(6):E634-40.
- 12 25. Callender CO, Hall MB, Branch D. An assessment of the effectiveness of the mottep model for
- 13 increasing donation rates and preventing the need for transplantation - Adult findings:
- 14 Program years 1998 and 1999. *Semin Nephrol* 2001;**21**(4):419-28.
- 15 26. Allen MD, Stillwater B. Organ donation and transplantation: A new tradition of sharing for Alaska
- 16 Natives. Siegel, Jason T [Ed]; Alvaro, Eusebio M [Ed] (2010) *Understanding organ donation:*
- 17 *Applied behavioral science perspectives* (pp 83-97) xxii, 368 pp Wiley-Blackwell, 2010.
- 18 27. Prochaska JO, Velicer WF. The transtheoretical model of health behavior change. *Am J Health*
- 19 *Promot* 1997;**12**(1):38-48.
- 20 28. Fahrenwald NL, Belitz C, Keckler A. "tribes sharing life": An organ donation educational
- 21 intervention for american indian tribal college and university students. *West J Nurs Res*
- 22 2011;**33**(7):901-15.
- 23 29. Frates J, Bohrer GG, Thomas D. Promoting organ donation to Hispanics: the role of the media
- 24 and medicine. *J Health Commun* 2006;**11**(7):683-98.
- 25 30. Salim A, Berry C, Ley EJ, et al. Utilizing the media to help increase organ donation in the Hispanic
- 26 American population. *Clin Transplant* 2011;**25**(6):E622-8.
- 27 31. Alvaro EM, Jones SP, Robles AS, et al. Hispanic organ donation: impact of a Spanish-language
- 28 organ donation campaign. *J Natl Med Assoc* 2006;**98**(1):28-35.
- 29 32. Hebert PL, Rivera J, Eng K, et al. Improving Organ Donation in Chinese Communities in New York.
- 30 *Understanding Organ Donation: Wiley-Blackwell, 2010:119-31.*
- 31 33. Morgan M, Hooper R, Mayblin M, et al. Attitudes to kidney donation and registering as a donor
- 32 among ethnic groups in the UK. *J Public Health* 2006;**28**(3):226-34.
- 33 34. Morgan SE, Miller JK, Arasaratnam LA. Similarities and differences between African Americans
- 34 and European Americans attitudes, knowledge, and willingness to communicate about organ
- 35 donation. *J Appl Soc Psychol* 2003(4):693-715.
- 36 35. Rodrigue JR, Cornell DL, Howard RJ. Relationship of exposure to organ donation information to
- 37 attitudes, beliefs, and donation decisions of next of kin. *Prog Transplant* 2009;**19**(2):173-79.
- 38 36. Madigan ME, Smith-Wheelock L, Krein SL. Healthy hair starts with a healthy body: hair stylists as
- 39 lay health advisors to prevent chronic kidney disease. *Prev Chronic Dis* 2007;**4**(3):A64.
- 40 37. Liu J, Davidson E, Bhopal R, et al. Adapting health promotion interventions to meet the needs of
- 41 ethnic minority groups: mixed-methods evidence synthesis. *Health Technol Assess*
- 42 2012;**16**(44):1-469.
- 43 38. NHSBT. One in four denied dying wish - Black and Asian families over-rule loved ones' decision to
- 44 donate organs. Secondary One in four denied dying wish - Black and Asian families over-rule
- 45 loved ones' decision to donate organs 2011.
- 46 <http://www.nhsbt.nhs.uk/news/2011/newsrelease040311.html> (Accessed: 10 August 2013).
- 47
- 48
- 49
- 50
- 51
- 52
- 53
- 54
- 55
- 56
- 57
- 58
- 59
- 60

**Appendix: Search strategy for Medline Ovid, 1980-2012**

| Database, Years Searched     | Search Strategy                                                                                                                                                                                                                                                                                                                                                                                                                                                                                                                                                                                                                                                                                                                                                                                                                                                                                                                                                                                                                                                                                                                                                                                                                                                                                                                                                                                                                                                                                                                                                                                                                                                                                                                                                                                                                                                                                                                                                                                                                                                                                                                                                                                                                                                                                                                                                                                                                                                                                                                                                                                                                                                                                                                                                                                                                                                                                                          |
|------------------------------|--------------------------------------------------------------------------------------------------------------------------------------------------------------------------------------------------------------------------------------------------------------------------------------------------------------------------------------------------------------------------------------------------------------------------------------------------------------------------------------------------------------------------------------------------------------------------------------------------------------------------------------------------------------------------------------------------------------------------------------------------------------------------------------------------------------------------------------------------------------------------------------------------------------------------------------------------------------------------------------------------------------------------------------------------------------------------------------------------------------------------------------------------------------------------------------------------------------------------------------------------------------------------------------------------------------------------------------------------------------------------------------------------------------------------------------------------------------------------------------------------------------------------------------------------------------------------------------------------------------------------------------------------------------------------------------------------------------------------------------------------------------------------------------------------------------------------------------------------------------------------------------------------------------------------------------------------------------------------------------------------------------------------------------------------------------------------------------------------------------------------------------------------------------------------------------------------------------------------------------------------------------------------------------------------------------------------------------------------------------------------------------------------------------------------------------------------------------------------------------------------------------------------------------------------------------------------------------------------------------------------------------------------------------------------------------------------------------------------------------------------------------------------------------------------------------------------------------------------------------------------------------------------------------------------|
| Medline<br>OVID<br>1980-2012 | <ol style="list-style-type: none"> <li>1. randomized controlled trial/ or clinical trial/ or controlled clinical trial/ or multicenter study/ or single blind method/ or double blind method/ or random allocation/ or chi square distribution/ or control groups/ or Cross-Sectional Studies/ or Cohort Studies/</li> <li>2. (randomized controlled trial or controlled clinical trial or multicenter study).pt.</li> <li>3. (random adj2 allocat*).tw.</li> <li>4. (control* adj2 (clinical or group* or trial* or study or studies or design* or methods or random*)).ti,ab.</li> <li>5. ((multicent* or multi-cent* or multisite? or multi-site?) adj (study or studies or trial*)).ti,ab.</li> <li>6. (random* or quasi* or "before and after").ti,ab.</li> <li>7. randomized controlled trials as topic/ or clinical trials as topic/</li> <li>8. ((single or double or treble or triple) adj (blind* or mask*)).tw.</li> <li>9. chi-square?.ti,ab.</li> <li>10. Chi-Square Distribution/</li> <li>11. Research Design/</li> <li>12. Matched-Pair Analysis/</li> <li>13. matched pair*.ti,ab.</li> <li>14. Meta-Analysis/</li> <li>15. meta analy*.ti,ab.</li> <li>16. "Outcome Assessment (Health Care)"/</li> <li>17. (outcome* stud* or intervention* stud*).ti,ab.</li> <li>18. Intervention Studies/</li> <li>19. follow up studies/ or pilot projects/ or prospective studies/</li> <li>20. Evaluation Studies as Topic/</li> <li>21. Evaluation Studies/</li> <li>22. (effective adj3 intervention*).ti,ab.</li> <li>23. (evaluat* adj3 intervention*).ti,ab.</li> <li>24. (outcome* adj3 measure*).ti,ab.</li> <li>25. primary outcome*.ti,ab.</li> <li>26. secondary outcome*.ti,ab.</li> <li>27. Comparative Study/</li> <li>28. evaluat*.tw.</li> <li>29. or/1-28</li> <li>30. exp "Tissue and Organ Procurement"/</li> <li>31. ((cadaver or deceased or dead) adj2 (donor* or donat*)).ti,ab.</li> <li>32. ((organ or organs) adj3 (donor* or donat*)).ti,ab.</li> <li>33. ((cadaver or deceased) adj2 (donat* or donor*)).ti,ab.</li> <li>34. ((postmortem or post mortem) adj2 (donat* or donor*)).ti,ab.</li> <li>35. ("organ donor" or "organ donors" or "organ donation").ti,ab.</li> <li>36. or/30-35</li> <li>37. Indians, North American/</li> <li>38. African Americans/ or Asian Americans/</li> <li>39. "native american*".tw.</li> <li>40. (race or racial or ethnic* or native american* or native canadian* or native alaskan* or american indian* or canadian indian* or amerind* or negro* or afro* or african* or black or blacks or arab* or asian* or chinese or japanese or oriental* or thai* or philipino* or filipino* or taiwanese* or indian* or bengali* or kashmiri* or gujarati* or tamil* or bangladeshi* or pakistani* or sri lankan* or hispanic* or latino* or nonwhite* or non-white* or multiracial or multi-racial).tw.</li> <li>41. Hispanic Americans/</li> </ol> |



|    |                                                                               |
|----|-------------------------------------------------------------------------------|
| 1  |                                                                               |
| 2  |                                                                               |
| 3  |                                                                               |
| 4  | 42. Mexican Americans/                                                        |
| 5  | 43. ethnic groups/                                                            |
| 6  | 44. (culture or cultural or faith* or relig* or sikh* or hindu* or muslim* or |
| 7  | islam* or christian* or catholic* or judaism or jew* or buddhis* or           |
| 8  | jehovah* or evangelical or evangelist* or adventist* or pentacostal).tw.      |
| 9  | 45. Minority Groups/                                                          |
| 10 | 46. Continental Population Groups/                                            |
| 11 | 47. Asian Continental Ancestry Group/                                         |
| 12 | 48. Asian Continental Ancestry Group/ or African Continental Ancestry         |
| 13 | Group/ or Ethnic Groups/                                                      |
| 14 | 49. british asian*.tw.                                                        |
| 15 | 50. british african*.tw.                                                      |
| 16 | 51. or/37-50                                                                  |
| 17 | 52. 29 and 36 and 51                                                          |
| 18 | 53. (consent* adj3 (increas* or accept* or participat* or encourag* or        |
| 19 | facilitat* or influenc* or promot* or chang* or focus* or motivat*)).tw.      |
| 20 | 54. informed consent/                                                         |
| 21 | 55. cultural competency/                                                      |
| 22 | 56. decision making/                                                          |
| 23 | 57. Communication/ or Communication Barriers/                                 |
| 24 | 58. Communications Media/                                                     |
| 25 | 59. (media or message* or communicat* or television or radio or               |
| 26 | broadcast* or internet or campaign* or program* or leaflet* or                |
| 27 | questionnaire* or literature or pamphlet* or resource*).tw.                   |
| 28 | 60. ((register* or registration) adj3 (increas* or accept* or encourag* or    |
| 29 | facilitat* or influenc* or promot* or chang* or focus* or motivat*)).tw.      |
| 30 | 61. ((register* or registration or registry or registries) adj3 (increas* or  |
| 31 | accept* or encourag* or facilitat* or influenc* or promot* or chang* or       |
| 32 | focus* or motivat*)).tw.                                                      |
| 33 | 62. (intervention* or multiintervention* or multi-intervention* or            |
| 34 | postintervention* or post-intervention* or preintervention* or pre-           |
| 35 | intervention*).tw.                                                            |
| 36 | 63. Patient Education Handout/ or Health Education/ or Education/ or          |
| 37 | Patient Education as Topic/                                                   |
| 38 | 64. Patient Participation/ or intention/                                      |
| 39 | 65. Attitude to Health/                                                       |
| 40 | 66. Health Knowledge, Attitudes, Practice/                                    |
| 41 | 67. "Attitude of Health Personnel"/                                           |
| 42 | 68. Health Personnel/ed [Education]                                           |
| 43 | 69. Health Policy/ or "Delivery of Health Care"/                              |
| 44 | 70. (policy or policies or practice or practices).tw.                         |
| 45 | 71. or/53-70                                                                  |
| 46 | 72. 29 and 36 and 51 and 71                                                   |
| 47 | 73. ("tissue donor" or "tissue donors" or "tissue donation").tw.              |
| 48 | 74. 72 not 73                                                                 |
| 49 | 75. *living donors/                                                           |
| 50 | 76. 74 not 75                                                                 |
| 51 | Added line 77 as a double safety check to see if the live donor papers        |
| 52 | included any live and dead donors – 2 selected.                               |
| 53 | 77. 74 not 76                                                                 |
| 54 | 78. from 77 keep 16,30                                                        |
| 55 |                                                                               |
| 56 |                                                                               |
| 57 |                                                                               |
| 58 |                                                                               |
| 59 |                                                                               |
| 60 |                                                                               |
